# Supplementary material for: A Comparative Analysis of the Stomach, Gut, and Lung Microbiomes in Rattus norvegicus
Source: MDPI journal article supplement (doi:10.3390/microorganisms11092359), 2023-09-20
Supplement: s1 [file s1]

**Table S1. Number of raw reads and cleaned tags obtained from *R. norvegicus* gut, stomach, and lungs.**

| Sample ID    | Specimens | Total raw reads  | Total clean tags | Q20(%)              | Q30(%)              |
|--------------|-----------|------------------|------------------|---------------------|---------------------|
| A02          | Gut       | 124,767          | 112,689          | 98                  | 93.6                |
| A04          | Gut       | 130,049          | 115,352          | 97.8                | 93                  |
| D02          | Gut       | 126,997          | 117,669          | 98                  | 93.5                |
| D04          | Gut       | 124,202          | 114,333          | 98                  | 93.5                |
| E02          | Gut       | 124,283          | 105,546          | 97.9                | 93.4                |
| E04          | Gut       | 125,365          | 107,436          | 97.4                | 92.3                |
| H04          | Gut       | 130,509          | 119,215          | 98                  | 93.4                |
| A01          | Stomach   | 128,371          | 113,866          | 98                  | 93.7                |
| A03          | Stomach   | 121,698          | 109,333          | 98                  | 93.4                |
| D01          | Stomach   | 120,102          | 107,655          | 97.9                | 93.1                |
| E01          | Stomach   | 127,364          | 114,193          | 97.8                | 93.1                |
| D03          | Stomach   | 122,405          | 110,556          | 98                  | 93.3                |
| E03          | Stomach   | 131,065          | 117,557          | 97.9                | 93.1                |
| H01          | Stomach   | 121,451          | 110,476          | 98                  | 93.4                |
| L01          | Lung      | 125,838          | 103,357          | 98.1                | 93.7                |
| Z01          | Lung      | 125,987          | 112,549          | 97.8                | 93.1                |
| Z02          | Lung      | 123,550          | 114,417          | 98.2                | 94                  |
| Z05          | Lung      | 123,725          | 109,861          | 98.1                | 93.8                |
| Z06          | Lung      | 120,422          | 106,576          | 98.4                | 94.5                |
| Z07          | Lung      | 122,492          | 108,152          | 97.9                | 93.3                |
| Z08          | Lung      | 125,168          | 108,701          | 98.2                | 94                  |
| <b>Total</b> | <b>--</b> | <b>2,625,810</b> | <b>2,339,489</b> | <b>97.97 (avg.)</b> | <b>93.44 (avg.)</b> |

**Table S2. Total number of OTUs obtained from *R. norvegicus* gut, stomach, and lungs.**

| Sample ID    | Specimens | No. of OTUs  | No. of seqs      |
|--------------|-----------|--------------|------------------|
| A02          | Gut       | 187          | 102,606          |
| A04          | Gut       | 263          | 96,255           |
| D02          | Gut       | 122          | 106,377          |
| D04          | Gut       | 168          | 102,454          |
| E02          | Gut       | 291          | 75,092           |
| E04          | Gut       | 142          | 98,629           |
| H04          | Gut       | 141          | 113,417          |
| A01          | Stomach   | 405          | 89,850           |
| A03          | Stomach   | 493          | 102,038          |
| D01          | Stomach   | 272          | 101,002          |
| D03          | Stomach   | 281          | 103,772          |
| E01          | Stomach   | 523          | 89,906           |
| E03          | Stomach   | 559          | 111,214          |
| H01          | Stomach   | 514          | 100,966          |
| Z01          | Lung      | 440          | 104,856          |
| Z02          | Lung      | 318          | 109,065          |
| Z05          | Lung      | 422          | 84,659           |
| Z06          | Lung      | 488          | 64,323           |
| Z07          | Lung      | 541          | 92,482           |
| Z08          | Lung      | 415          | 75,396           |
| L01          | Lung      | 109          | 70,806           |
| <b>Total</b> | <b>--</b> | <b>7,094</b> | <b>1,995,165</b> |

**Supplementary Table S3. Top 15 OUTs abundance among the *R. norvegicus* gut, lungs, and stomach groups**

| OTUs                                                                                                                        | Gut      | Lung     | Stomach  | Grade |
|-----------------------------------------------------------------------------------------------------------------------------|----------|----------|----------|-------|
| OTU_1:k:Bacteria,p:Firmicutes,c:Bacilli,o:Lactobacillales,f:Lactobacillaceae,g:Lactobacillus,s:Lactobacillus johnsonii      | 0.380706 | 0.062072 | 0.301744 | 15    |
| OTU_4:k:Bacteria,p:Firmicutes,c:Bacilli,o:Lactobacillales,f:Lactobacillaceae,g:Lactobacillus,s:Limosilactobacillus reuteri  | 0.140509 | 0.014289 | 0.050605 | 14    |
| OTU_3:k:Bacteria,p:Proteobacteria,c:Gammaproteobacteria,o:Burkholderiales,f:Alcaligenaceae,g:Bordetella,s:Bordetella hinzii | 0.031462 | 0.156057 | 0.000537 | 13    |
| OTU_6:k:Bacteria,p:Firmicutes,c:Bacilli,o:Erysipelotrichales,f:Erysipelotrichaceae,g:Turicibacter,s:Turicibacter sp. LA61   | 0.142502 | 0.013454 | 0.009152 | 12    |
| OTU_5:k:Bacteria,p:Firmicutes,c:Bacilli,o:Lactobacillales,f:Lactobacillaceae,g:Lactobacillus,s:Lactobacillus intestinalis   | 0.011561 | 0.011139 | 0.101311 | 11    |

|                                                                                                                                            |          |          |          |    |
|--------------------------------------------------------------------------------------------------------------------------------------------|----------|----------|----------|----|
| OTU_10:k: Bacteria,p:Firmicutes,c:Bacilli,o:Lactobacillales,f:Lactobacillaceae,g:Lactobacillus,s:Lactobacillus murinus                     | 0.01064  | 0.057697 | 0.026284 | 10 |
| OTU_7:k: Bacteria,p:Actinobacteriota,c:Actinobacteria,o:Bifidobacteriales,f:Bifidobacteriaceae,g:Bifidobacterium,s:Bifidobacterium faecale | 0.002024 | 0.050212 | 0.027289 | 9  |
| OTU_13:k: Bacteria,p:Firmicutes,c:Bacilli,o:Lactobacillales,f:Streptococcaceae,g:Streptococcus,s:Streptococcus gallolyticus                | 0.003058 | 0.040874 | 0.03094  | 8  |
| OTU_1149:k: Bacteria,p:Firmicutes,c:Bacilli,o:Lactobacillales,f:Lactobacillaceae,g:Lactobacillus,s:Lactobacillus acidophilus               | 0.035032 | 0.012738 | 0.022874 | 7  |
| OTU_22:k: Bacteria,p:Bacteroidota,c:Bacteroidia,o:Bacteroidales,f:Prevotellaceae,g:Prevotella,s:uncultured Prevotella                      | 9.07E-05 | 0.044501 | 0.008811 | 6  |
| OTU_9:k: Bacteria,p:Campilobacterota,c:Campylobacteria,o:Campylobacteriales,f:Helicobacteraceae,g:Helicobacter,s:Helicobacter apodemus     | 0.02684  | 0.003566 | 0.021162 | 5  |
| OTU_8:k: Bacteria,p:Campilobacterota,c:Campylobacteria,o:Campylobacteriales,f:Helicobacteraceae,g:Helicobacter,s:Helicobacter muridarum    | 0.020055 | 0.001105 | 0.028215 | 4  |
| OTU_15:k: Bacteria,p:Firmicutes,c:Bacilli,o:Staphylococcales,f:Staphylococcaceae,g:Macrococcus,s:Macrococcus goetzii                       | 0.017565 | 0.023584 | 0.003415 | 3  |
| OTU_12:k: Bacteria,p:Proteobacteria,c:Gammaproteobacteria,o:Enterobacteriales,f:Enterobacteriaceae,g:Escherichia-Shigella,s:E. coli        | 0.016709 | 0.011207 | 0.015924 | 2  |
| OTU_11:k: Bacteria,p:Proteobacteria,c:Gammaproteobacteria,o:Burkholderiales,f:Burkholderiaceae,g:Ralstonia,s:Ralstonia insidiosa           | 0.043501 | 6.65E-06 | 2.86E-05 | 1  |

**Keynote:** k: kingdom, p: phylum, c: class, o: order, f: family, g: genus, s: species

**Supplementary Table S4. Details of taxonomic levels among the top 20 OTUs in the *Rattus norvegicus* gut, lung, and stomach.**

| OTUs                                                                                                                                        | Gut      | Lung     | Stomach  |
|---------------------------------------------------------------------------------------------------------------------------------------------|----------|----------|----------|
| OTU_1:k: Bacteria,p:Firmicutes,c:Bacilli,o:Lactobacillales,f:Lactobacillaceae,g:Lactobacillus,s:Lactobacillus johnsonii                     | 0.380706 | 0.062072 | 0.301744 |
| OTU_4:k: Bacteria,p:Firmicutes,c:Bacilli,o:Lactobacillales,f:Lactobacillaceae,g:Lactobacillus,s:Limosilactobacillus reuteri                 | 0.140509 | 0.014289 | 0.050605 |
| OTU_3:k: Bacteria,p:Proteobacteria,c:Gammaproteobacteria,o:Burkholderiales,f:Alcaligenaceae,g:Bordetella, s:Bordetella hinzii               | 0.031462 | 0.156057 | 0.000537 |
| OTU_6:k: Bacteria,p:Firmicutes,c:Bacilli,o:Erysipelotrichales,f:Erysipelotrichaceae,g:Turicibacter,s:Turicibacter sp. LA61                  | 0.142502 | 0.013454 | 0.009152 |
| OTU_5:k: Bacteria,p:Firmicutes,c:Bacilli,o:Lactobacillales,f:Lactobacillaceae,g:Lactobacillus,s:Lactobacillus intestinalis                  | 0.011561 | 0.011139 | 0.101311 |
| OTU_10:k: Bacteria,p:Firmicutes,c:Bacilli,o:Lactobacillales,f:Lactobacillaceae,g:Lactobacillus,s:Lactobacillus murinus                      | 0.01064  | 0.057697 | 0.026284 |
| OTU_7:k: Bacteria,p:Actinobacteriota,c:Actinobacteria,o:Bifidobacteriales,f:Bifidobacteriaceae,g:Bifidobacterium, s:Bifidobacterium faecale | 0.002024 | 0.050212 | 0.027289 |
| OTU_13:k: Bacteria,p:Firmicutes,c:Bacilli,o:Lactobacillales,f:Streptococcaceae,g:Streptococcus,s:Streptococcus gallolyticus                 | 0.003058 | 0.040874 | 0.03094  |
| OTU_1149:k: Bacteria,p:Firmicutes,c:Bacilli,o:Lactobacillales,f:Lactobacillaceae,g:Lactobacillus,s:Lactobacillus acidophilus                | 0.035032 | 0.012738 | 0.022874 |
| OTU_9:k: Bacteria,p:Campilobacterota,c:Campylobacteria,o:Campylobacteriales,f:Helicobacteraceae,g:Helicobacter,s:Helicobacter apodemus      | 0.02684  | 0.003566 | 0.021162 |
| OTU_8:k: Bacteria,p:Campilobacterota,c:Campylobacteria,o:Campylobacteriales,f:Helicobacteraceae,g:Helicobacter,s:Helicobacter muridarum     | 0.020055 | 0.001105 | 0.028215 |
| OTU_22:k: Bacteria,p:Bacteroidota,c:Bacteroidia,o:Bacteroidales,f:Prevotellaceae,g:Prevotella, s:uncultured Prevotella                      | 9.07E-05 | 0.044501 | 0.008811 |

|                                                                                                                                                 |          |          |          |
|-------------------------------------------------------------------------------------------------------------------------------------------------|----------|----------|----------|
| OTU_11:k:Bacteria,p:Proteobacteria,c:Gammaproteobacteria,o:Burkholderiales,f:Burkholderiaceae,g:Ralstonia, s:Ralstonia insidiosa                | 0.043501 | 6.65E-06 | 2.86E-05 |
| OTU_12:k:Bacteria,p:Proteobacteria,c:Gammaproteobacteria,o:Enterobacterales,f:Enterobacteriaceae,g:Escherichia-Shigella, s:E. coli              | 0.016709 | 0.011207 | 0.015924 |
| OTU_15:k:Bacteria,p:Firmicutes,c:Bacilli,o:Staphylococcales,f:Staphylococcaceae,g:Macrococcus,s:Macrococcus goetzii                             | 0.017565 | 0.023584 | 0.003415 |
| OTU_14:k:Bacteria,p:Bacteroidota,c:Bacteroidia,o:Bacteroidales,f:Porphyromonadaceae,g:Porphyromonas,s:uncultured bacterium                      | 3.74E-05 | 0.034643 | 0.000664 |
| OTU_16:k:Bacteria,p:Actinobacteriota,c:Coriobacteriia,o:Coriobacteriales,f:Atopobiaceae,g:Olsenella,s:uncultured bacterium                      | 0.000933 | 0.01331  | 0.018105 |
| OTU_23:k:Bacteria,p:Proteobacteria,c:Gammaproteobacteria,o:Pasteurellales,f:Pasteurellaceae,g:Rodentibacter,s:Pasteurellaceae bacterium         | 0.000351 | 0.028348 | 0.005274 |
| OTU_17:k:Bacteria,p:Firmicutes,c:Bacilli,o:Lactobacillales,f:Lactobacillaceae,g:Lactobacillus, s:Limosilactobacillus mucosae                    | 0.003985 | 0.010735 | 0.016678 |
| OTU_18:k:Bacteria,p:Actinobacteriota,c:Actinobacteria,o:Bifidobacteriales,f:Bifidobacteriaceae,g:Bifidobacterium,s:Bifidobacterium pseudolongum | 0.001172 | 0.017402 | 0.009252 |

**Keynote:** k: kingdom, p: phylum, c: class, o: order, f: family, g: genus, s: species

**Supplementary Table S5. Values of heatmap based on Bray-Curtis distance.**

| Samples    | L01   | A01   | A03   | D01   | E01   | D03   | E03   | H01   | Z01   | Z02   | Z05   | Z06   | Z07   | Z08   | A02   | A04   | D02   | D04   | E02   | E04   | H04   |
|------------|-------|-------|-------|-------|-------|-------|-------|-------|-------|-------|-------|-------|-------|-------|-------|-------|-------|-------|-------|-------|-------|
| <b>L01</b> | 0     | 0.958 | 0.980 | 0.986 | 0.992 | 0.926 | 0.921 | 0.958 | 0.980 | 0.988 | 0.964 | 0.972 | 0.976 | 0.968 | 0.989 | 0.983 | 0.994 | 0.927 | 0.981 | 0.996 | 0.989 |
| <b>A01</b> | 0.958 | 0     | 0.534 | 0.617 | 0.600 | 0.504 | 0.535 | 0.560 | 0.412 | 0.941 | 0.571 | 0.573 | 0.584 | 0.506 | 0.484 | 0.611 | 0.736 | 0.689 | 0.714 | 0.864 | 0.548 |
| <b>A03</b> | 0.980 | 0.534 | 0     | 0.422 | 0.676 | 0.483 | 0.434 | 0.561 | 0.741 | 0.931 | 0.699 | 0.651 | 0.704 | 0.674 | 0.418 | 0.477 | 0.650 | 0.656 | 0.776 | 0.919 | 0.384 |
| <b>D01</b> | 0.986 | 0.617 | 0.422 | 0     | 0.706 | 0.542 | 0.453 | 0.461 | 0.835 | 0.944 | 0.756 | 0.670 | 0.784 | 0.750 | 0.524 | 0.328 | 0.426 | 0.536 | 0.751 | 0.915 | 0.469 |
| <b>E01</b> | 0.992 | 0.600 | 0.676 | 0.706 | 0     | 0.664 | 0.669 | 0.553 | 0.626 | 0.961 | 0.518 | 0.515 | 0.542 | 0.589 | 0.767 | 0.758 | 0.768 | 0.789 | 0.673 | 0.954 | 0.749 |
| <b>D03</b> | 0.926 | 0.504 | 0.483 | 0.542 | 0.664 | 0     | 0.396 | 0.517 | 0.678 | 0.932 | 0.601 | 0.541 | 0.610 | 0.560 | 0.533 | 0.524 | 0.683 | 0.667 | 0.726 | 0.927 | 0.535 |
| <b>E03</b> | 0.921 | 0.535 | 0.434 | 0.453 | 0.669 | 0.396 | 0     | 0.511 | 0.745 | 0.922 | 0.702 | 0.591 | 0.651 | 0.651 | 0.437 | 0.367 | 0.587 | 0.601 | 0.723 | 0.902 | 0.443 |
| <b>H01</b> | 0.958 | 0.560 | 0.561 | 0.461 | 0.553 | 0.517 | 0.511 | 0     | 0.680 | 0.942 | 0.620 | 0.567 | 0.548 | 0.612 | 0.663 | 0.637 | 0.669 | 0.704 | 0.686 | 0.928 | 0.666 |
| <b>Z01</b> | 0.980 | 0.412 | 0.741 | 0.835 | 0.626 | 0.678 | 0.745 | 0.680 | 0     | 0.946 | 0.537 | 0.586 | 0.497 | 0.576 | 0.740 | 0.854 | 0.853 | 0.862 | 0.740 | 0.849 | 0.816 |
| <b>Z02</b> | 0.988 | 0.941 | 0.931 | 0.944 | 0.961 | 0.932 | 0.922 | 0.942 | 0.946 | 0     | 0.958 | 0.955 | 0.949 | 0.962 | 0.958 | 0.931 | 0.954 | 0.708 | 0.931 | 0.960 | 0.967 |
| <b>Z05</b> | 0.964 | 0.571 | 0.699 | 0.756 | 0.518 | 0.601 | 0.702 | 0.620 | 0.537 | 0.958 | 0     | 0.348 | 0.363 | 0.440 | 0.823 | 0.821 | 0.805 | 0.832 | 0.594 | 0.950 | 0.826 |
| <b>Z06</b> | 0.972 | 0.573 | 0.651 | 0.670 | 0.515 | 0.541 | 0.591 | 0.567 | 0.586 | 0.955 | 0.348 | 0     | 0.384 | 0.365 | 0.775 | 0.716 | 0.721 | 0.745 | 0.572 | 0.948 | 0.773 |
| <b>Z07</b> | 0.976 | 0.584 | 0.704 | 0.784 | 0.542 | 0.610 | 0.651 | 0.548 | 0.497 | 0.949 | 0.363 | 0.384 | 0     | 0.462 | 0.832 | 0.828 | 0.813 | 0.845 | 0.674 | 0.943 | 0.835 |
| <b>Z08</b> | 0.968 | 0.506 | 0.674 | 0.750 | 0.589 | 0.560 | 0.651 | 0.612 | 0.576 | 0.962 | 0.440 | 0.365 | 0.462 | 0     | 0.730 | 0.770 | 0.816 | 0.788 | 0.690 | 0.954 | 0.733 |
| <b>A02</b> | 0.989 | 0.484 | 0.418 | 0.524 | 0.767 | 0.533 | 0.437 | 0.663 | 0.740 | 0.958 | 0.823 | 0.775 | 0.832 | 0.730 | 0     | 0.376 | 0.653 | 0.647 | 0.806 | 0.773 | 0.218 |

|            |       |       |       |       |       |       |       |       |       |       |       |       |       |       |       |       |       |       |       |       |       |
|------------|-------|-------|-------|-------|-------|-------|-------|-------|-------|-------|-------|-------|-------|-------|-------|-------|-------|-------|-------|-------|-------|
| <b>A04</b> | 0.983 | 0.611 | 0.477 | 0.328 | 0.758 | 0.524 | 0.367 | 0.637 | 0.854 | 0.931 | 0.821 | 0.716 | 0.828 | 0.770 | 0.376 | 0     | 0.406 | 0.432 | 0.728 | 0.889 | 0.365 |
| <b>D02</b> | 0.994 | 0.736 | 0.650 | 0.426 | 0.768 | 0.683 | 0.587 | 0.669 | 0.853 | 0.954 | 0.805 | 0.721 | 0.813 | 0.816 | 0.653 | 0.406 | 0     | 0.578 | 0.744 | 0.895 | 0.646 |
| <b>D04</b> | 0.927 | 0.689 | 0.656 | 0.536 | 0.789 | 0.667 | 0.601 | 0.704 | 0.862 | 0.708 | 0.832 | 0.745 | 0.845 | 0.788 | 0.647 | 0.432 | 0.578 | 0     | 0.634 | 0.923 | 0.645 |
| <b>E02</b> | 0.981 | 0.714 | 0.776 | 0.751 | 0.673 | 0.726 | 0.723 | 0.686 | 0.740 | 0.931 | 0.594 | 0.572 | 0.674 | 0.690 | 0.806 | 0.728 | 0.744 | 0.634 | 0     | 0.923 | 0.783 |
| <b>E04</b> | 0.996 | 0.864 | 0.919 | 0.915 | 0.954 | 0.927 | 0.902 | 0.928 | 0.849 | 0.960 | 0.950 | 0.948 | 0.943 | 0.954 | 0.773 | 0.889 | 0.895 | 0.923 | 0.923 | 0     | 0.907 |
| <b>H04</b> | 0.989 | 0.548 | 0.384 | 0.469 | 0.749 | 0.535 | 0.443 | 0.666 | 0.816 | 0.967 | 0.826 | 0.773 | 0.835 | 0.733 | 0.218 | 0.365 | 0.646 | 0.645 | 0.783 | 0.907 | 0     |

A01 (stomach); A03 (stomach); D01 (stomach); E01 (stomach); D03 (stomach); E03 (stomach); H01 (stomach)  
L01 (lung); Z01 (lung); Z02 (lung); Z05 (lung); Z06 (lung); Z07 (lung); Z08 (lung)  
A02 (gut); A04 (gut); D02 (gut); D04 (gut); E02 (gut); E04 (gut); H04 (gut)

**Supplementary Table S6. Values of heatmap based on Euclidean distance.**

| Samples    | L01   | A01   | A03   | D01   | E01   | D03   | E03   | H01   | Z01   | Z02   | Z05    | Z06   | Z07   | Z08   | A02   | A04   | D02   | D04   | E02    | E04   | H04   |
|------------|-------|-------|-------|-------|-------|-------|-------|-------|-------|-------|--------|-------|-------|-------|-------|-------|-------|-------|--------|-------|-------|
| <b>L01</b> | 0     | 1.404 | 1.412 | 1.413 | 1.412 | 1.394 | 1.388 | 1.402 | 1.409 | 1.412 | 1.4015 | 1.408 | 1.409 | 1.405 | 1.412 | 1.411 | 1.413 | 1.400 | 1.411  | 1.414 | 1.413 |
| <b>A01</b> | 1.404 | 0     | 0.727 | 0.833 | 0.806 | 0.577 | 0.613 | 0.919 | 0.852 | 1.399 | 0.9246 | 0.841 | 1.006 | 0.596 | 0.565 | 0.677 | 1.038 | 0.905 | 1.1767 | 1.244 | 0.626 |
| <b>A03</b> | 1.412 | 0.727 | 0     | 0.637 | 0.931 | 0.623 | 0.533 | 0.835 | 1.159 | 1.401 | 1.1093 | 0.925 | 1.161 | 0.823 | 0.470 | 0.598 | 0.988 | 0.876 | 1.205  | 1.358 | 0.477 |
| <b>D01</b> | 1.413 | 0.833 | 0.637 | 0     | 0.889 | 0.653 | 0.531 | 0.502 | 1.217 | 1.402 | 1.0681 | 0.861 | 1.146 | 0.900 | 0.697 | 0.507 | 0.712 | 0.822 | 1.168  | 1.360 | 0.666 |
| <b>E01</b> | 1.412 | 0.806 | 0.931 | 0.889 | 0     | 0.830 | 0.836 | 0.846 | 1.044 | 1.398 | 0.788  | 0.802 | 0.812 | 0.780 | 0.900 | 0.901 | 1.089 | 1.045 | 1.135  | 1.372 | 0.884 |
| <b>D03</b> | 1.394 | 0.577 | 0.623 | 0.653 | 0.830 | 0     | 0.387 | 0.807 | 1.083 | 1.398 | 0.972  | 0.775 | 1.029 | 0.646 | 0.483 | 0.511 | 0.992 | 0.825 | 1.166  | 1.347 | 0.488 |
| <b>E03</b> | 1.388 | 0.613 | 0.533 | 0.531 | 0.836 | 0.387 | 0     | 0.792 | 1.130 | 1.400 | 1.062  | 0.812 | 1.089 | 0.731 | 0.332 | 0.286 | 0.883 | 0.741 | 1.167  | 1.335 | 0.326 |
| <b>H01</b> | 1.402 | 0.919 | 0.835 | 0.502 | 0.846 | 0.807 | 0.792 | 0     | 1.190 | 1.403 | 1.029  | 0.944 | 1.077 | 0.947 | 0.906 | 0.874 | 1.064 | 1.042 | 1.213  | 1.368 | 0.902 |
| <b>Z01</b> | 1.409 | 0.852 | 1.159 | 1.217 | 1.044 | 1.083 | 1.130 | 1.190 | 0     | 1.399 | 0.980  | 1.023 | 0.907 | 0.912 | 1.125 | 1.183 | 1.279 | 1.236 | 1.295  | 1.200 | 1.170 |
| <b>Z02</b> | 1.412 | 1.399 | 1.401 | 1.402 | 1.398 | 1.398 | 1.400 | 1.403 | 1.399 | 0     | 1.397  | 1.397 | 1.396 | 1.396 | 1.401 | 1.385 | 1.401 | 1.002 | 1.367  | 1.407 | 1.401 |
| <b>Z05</b> | 1.401 | 0.924 | 1.109 | 1.068 | 0.788 | 0.972 | 1.062 | 1.029 | 0.980 | 1.397 | 0      | 0.554 | 0.559 | 0.716 | 1.129 | 1.108 | 1.149 | 1.170 | 1.060  | 1.372 | 1.127 |
| <b>Z06</b> | 1.408 | 0.841 | 0.925 | 0.861 | 0.802 | 0.775 | 0.812 | 0.944 | 1.023 | 1.397 | 0.554  | 0     | 0.725 | 0.604 | 0.919 | 0.848 | 0.954 | 0.995 | 0.954  | 1.356 | 0.918 |
| <b>Z07</b> | 1.409 | 1.006 | 1.161 | 1.146 | 0.812 | 1.029 | 1.089 | 1.077 | 0.907 | 1.396 | 0.559  | 0.725 | 0     | 0.824 | 1.171 | 1.161 | 1.211 | 1.210 | 1.196  | 1.378 | 1.171 |
| <b>Z08</b> | 1.405 | 0.596 | 0.823 | 0.900 | 0.780 | 0.646 | 0.731 | 0.947 | 0.912 | 1.396 | 0.716  | 0.604 | 0.824 | 0     | 0.767 | 0.811 | 1.089 | 0.984 | 1.119  | 1.355 | 0.767 |
| <b>A02</b> | 1.412 | 0.565 | 0.470 | 0.697 | 0.900 | 0.483 | 0.332 | 0.906 | 1.125 | 1.401 | 1.129  | 0.919 | 1.171 | 0.767 | 0     | 0.444 | 1.003 | 0.808 | 1.188  | 1.206 | 0.303 |
| <b>A04</b> | 1.411 | 0.677 | 0.598 | 0.507 | 0.901 | 0.511 | 0.286 | 0.874 | 1.183 | 1.385 | 1.108  | 0.848 | 1.161 | 0.811 | 0.444 | 0     | 0.678 | 0.654 | 1.139  | 1.348 | 0.439 |
| <b>D02</b> | 1.413 | 1.038 | 0.988 | 0.712 | 1.089 | 0.992 | 0.883 | 1.064 | 1.279 | 1.401 | 1.149  | 0.954 | 1.211 | 1.089 | 1.003 | 0.678 | 0     | 0.864 | 1.157  | 1.366 | 1.00  |

|            |       |       |       |       |       |       |       |       |       |       |       |       |       |        |       |       |       |       |       |       |       |
|------------|-------|-------|-------|-------|-------|-------|-------|-------|-------|-------|-------|-------|-------|--------|-------|-------|-------|-------|-------|-------|-------|
| <b>D04</b> | 1.400 | 0.905 | 0.876 | 0.822 | 1.045 | 0.825 | 0.741 | 1.042 | 1.236 | 1.002 | 1.170 | 0.995 | 1.210 | 0.984  | 0.808 | 0.654 | 0.864 | 0     | 0.987 | 1.357 | 0.808 |
| <b>E02</b> | 1.411 | 1.176 | 1.205 | 1.168 | 1.135 | 1.166 | 1.167 | 1.213 | 1.295 | 1.367 | 1.060 | 0.954 | 1.196 | 1.119  | 1.188 | 1.139 | 1.157 | 0.987 | 0     | 1.375 | 1.178 |
| <b>E04</b> | 1.414 | 1.244 | 1.358 | 1.360 | 1.372 | 1.347 | 1.335 | 1.368 | 1.200 | 1.407 | 1.372 | 1.356 | 1.378 | 1.355  | 1.206 | 1.348 | 1.366 | 1.357 | 1.375 | 0     | 1.352 |
| <b>H04</b> | 1.413 | 0.626 | 0.477 | 0.666 | 0.884 | 0.488 | 0.326 | 0.902 | 1.170 | 1.401 | 1.127 | 0.918 | 1.171 | 0.7675 | 0.303 | 0.439 | 1.002 | 0.808 | 1.178 | 1.352 | 0     |

A01 (stomach); A03 (stomach); D01 (stomach); E01 (stomach); D03 (stomach); E03 (stomach); H01 (stomach)  
L01 (lung); Z01 (lung); Z02 (lung); Z05 (lung); Z06 (lung); Z07 (lung); Z08 (lung)  
A02 (gut); A04 (gut); D02 (gut); D04 (gut); E02 (gut); E04 (gut); H04 (gut)

**Supplementary Table S7. Unique 202 OTUs in lung samples, contributing to variance in the overall sequences obtained.**

| No. | OUT descriptions                                                                                                                     |
|-----|--------------------------------------------------------------------------------------------------------------------------------------|
| 1   | OTU_583:k:Bacteria,p:Firmicutes,c:Clostridia,o:Peptostreptococcales-Tissierellales,g:Parvimonas,s:Uncultured bacterium               |
| 2   | OTU_213:k:Bacteria,p:Proteobacteria,c:Gammaproteobacteria,o:Pseudomonadales,f:Moraxellaceae,g:Acinetobacter,s:Acinetobacter townneri |
| 3   | OTU_1306:k:Bacteria,p:Bacteroidota,c:Bacteroidia,o:Chitinophagales,f:Chitinophagaceae,g:Cnuella,s:Uncultured bacterium               |
| 4   | OTU_430:k:Bacteria,p:Fusobacteriia,c:Fusobacteriia,o:Fusobacteriales,f:Fusobacteriaceae,g:Cetobacterium,s:Cetobacterium somerae      |
| 5   | OTU_814:k:Bacteria,p:Proteobacteria,c:Gammaproteobacteria,o:Pasteurellales,f:Pasteurellaceae,s:[Actinobacillus] muris                |
| 6   | OTU_618:k:Bacteria,p:Bacteroidota,c:Bacteroidia,o:Bacteroidales,f:Porphyromonadaceae,g:Porphyromonas                                 |
| 7   | OTU_1254:k:Bacteria,p:Bacteroidota,c:Bacteroidia,o:Bacteroidales,f:Prevotellaceae,g:Prevotella                                       |
| 8   | OTU_3288:k:Bacteria,p:Firmicutes,c:Bacilli,o:Mycoplasmatales,f:Mycoplasmataceae,g:Mycoplasma,s:Uncultured Mycoplasma                 |
| 9   | OTU_3537:k:Bacteria,p:Proteobacteria,c:Gammaproteobacteria                                                                           |
| 10  | OTU_930:k:Bacteria,p:Firmicutes,c:Clostridia,o:Oscillospirales,f:[Eubacterium]-coprostanoligenes group                               |
| 11  | OTU_1423:k:Bacteria,p:Bacteroidota,c:Bacteroidia,o:Bacteroidales,f:Prevotellaceae,g:Prevotella                                       |
| 12  | OTU_1459:k:Bacteria,p:Proteobacteria,c:Gammaproteobacteria,o:Pseudomonadales,f:Moraxellaceae,g:Moraxella,s:uncultured bacterium      |
| 13  | OTU_4466:k:Bacteria,p:Firmicutes,c:Clostridia,o:Peptostreptococcales-Tissierellales,g:Gallicola,s:Miniphocibacter massiliensis       |
| 14  | OTU_3367:k:Bacteria,p:Proteobacteria,c:Gammaproteobacteria,o:Pasteurellales,f:Pasteurellaceae,s:Rodentibacter pneumotropicus         |
| 15  | OTU_3278:k:Bacteria,p:Proteobacteria,c:Gammaproteobacteria,o:Enterobacteriales,f:Enterobacteriaceae,g:Plesiomonas                    |
| 16  | OTU_4390:k:Bacteria,p:Proteobacteria,c:Gammaproteobacteria,o:Pasteurellales,f:Pasteurellaceae,s:Pasteurellaceae bacterium            |
| 17  | OTU_1688:k:Bacteria,p:Chloroflexi,c:Chloroflexia,o:Thermomicrobiales,f:JG30-KF-CM45                                                  |

18 OTU\_3070:k:Bacteria,p:Bacteroidota,c:Bacteroidia,o:Flavobacteriales,f:Weeksellaceae,g:Bergeyella  
 19 OTU\_2779:k:Bacteria,p:Actinobacteriota,c:Actinobacteria,o:Propionibacteriales,f:Propionibacteriaceae,g:Micropruina  
 20 OTU\_4124:k:Bacteria,p:Firmicutes,c:Clostridia,o:Christensenellales,f:Christensenellaceae,g:Christensenellaceae R-7 group,s:uncultured bacterium  
 21 OTU\_4257:k:Bacteria,p:Proteobacteria,c:Gammaproteobacteria,o:Burkholderiales,f:Alcaligenaceae,g:uncultured,s:uncultured bacterium  
 22 OTU\_1405:k:Bacteria,p:Firmicutes,c:Clostridia,o:Oscillospirales,f:Oscillospiraceae,g:UCG-003,s:uncultured bacterium  
 23 OTU\_2107:k:Bacteria,p:Cyanobacteria,c:Cyanobacteriia,o:Cyanobacteriales,f:Chroococcidiopsaceae,g:Chroococcidiopsis SAG-2023,s:Chroococcidiopsis BB79.2  
 24 OTU\_3419:k:Bacteria,p:Actinobacteriota,c:Thermoleophilia,o:Gaiellales,f:Gaiellaceae,g:Gaiella,s:uncultured bacterium  
 25 OTU\_3309:k:Bacteria,p:Firmicutes,c:Clostridia,o:Monoglobales,f:Monoglobaceae,g:Monoglobus,s:Uncultured bacterium  
 26 OTU\_2138:k:Bacteria,p:Proteobacteria,c:Alphaproteobacteria,o:Rhizobiales,f:Rhizobiaceae  
 27 OTU\_2171:k:Bacteria,p:Proteobacteria,c:Gammaproteobacteria,o:Aeromonadales,f:Succinivibrionaceae,g:Succinivibrio,s:Uncultured Succinivibrio  
 28 OTU\_4104:k:Bacteria,p:Firmicutes,c:Clostridia,o:Clostridiales,f:Clostridiaceae,g:Clostridium sensu stricto 1,s:uncultured bacterium  
 29 OTU\_4321:k:Bacteria,p:Patescibacteria,c:Saccharimonadia,o:Saccharimonadales, s:Uncultured bacterium  
 30 OTU\_2114:k:Bacteria,p:Deinococcota,c:Deinococci,o:Deinococcales,f:Deinococcaceae,g:Deinococcus  
 31 OTU\_1726:k:Bacteria,p:Proteobacteria,c:Gammaproteobacteria,o:Pseudomonadales,f:Moraxellaceae,g:Psychrobacter  
 32 OTU\_2600:k:Bacteria,p:Proteobacteria,c:Gammaproteobacteria,o:Burkholderiales,f:Oxalobacteraceae,g:Massilia,s:Uncultured  
 33 OTU\_2629:k:Bacteria,p:Bacteroidota,c:Bacteroidia,o:Sphingobacteriales,f:Sphingobacteriaceae,g:Solitalea  
 34 OTU\_2253:k:Bacteria,p:Proteobacteria,c:Gammaproteobacteria,o:Burkholderiales,f:Oxalobacteraceae,g:Undibacterium,s:Undibacterium macrobrachii  
 35 OTU\_4488:k:Bacteria,p:Firmicutes,c:Clostridia,o:Lachnospirales,f:Lachnospiraceae,g:Lachnospira,s:uncultured bacterium  
 36 OTU\_3979:k:Bacteria,s:Uncultured bacterium  
 37 OTU\_4114:k:Bacteria,p:Firmicutes,c:Clostridia,o:Oscillospirales,f:Oscillospiraceae,g:NK4A214 group,s:uncultured bacterium  
 38 OTU\_3773:k:Bacteria,p:Proteobacteria,c:Alphaproteobacteria,o:Rhizobiales,f:Xanthobacteraceae  
 39 OTU\_893:k:Bacteria,p:Proteobacteria,c:Alphaproteobacteria,o:Rhodobacterales,f:Rhodobacteraceae  
 40 OTU\_4434:k:Bacteria,p:Bacteroidota,c:Bacteroidia,o:Bacteroidales,f:Prevotellaceae,g:Prevotella,s:uncultured bacterium  
 41 OTU\_3308:k:Bacteria,p:Proteobacteria,c:Alphaproteobacteria,o:Azospirillales,f:Azospirillaceae,g:Skermanella  
 42 OTU\_3273:k:Bacteria,p:Firmicutes,c:Clostridia,o:Oscillospirales,f:Ruminococcaceae,g:Ruminococcus,s:uncultured bacterium  
 43 OTU\_2885:k:Bacteria,p:Firmicutes,c:Clostridia,o:Clostridiales,f:Clostridiaceae,g:Candidatus Arthromitus  
 44 OTU\_1075:k:Bacteria,p:Proteobacteria,c:Alphaproteobacteria,o:Rhizobiales,f:Rhizobiaceae  
 45 OTU\_1343:k:Bacteria,p:Firmicutes,c:Clostridia,o:Oscillospirales,f:Ruminococcaceae,g:Phoceas,Phoceas massiliensis  
 46 OTU\_2686:k:Bacteria,p:Proteobacteria,c:Alphaproteobacteria,o:Rhodobacterales,f:Rhodobacteraceae,g:uncultured,s:uncultured bacterium  
 47 OTU\_4110:k:Bacteria,p:Firmicutes,c:Clostridia,o:Oscillospirales,f:UCG-010  
 48 OTU\_4065:k:Bacteria,p:Bacteroidota,c:Bacteroidia,o:Bacteroidales,f:Bacteroidaceae,g:Bacteroides,s:uncultured bacterium

49 OTU\_515:k:Bacteria,p:Proteobacteria,c:Gammaproteobacteria,o:Enterobacterales,f:Morganellaceae,g:Proteus  
 50 OTU\_3783:k:Bacteria,p:Bacteroidota,c:Bacteroidia,o:Bacteroidales,f:Prevotellaceae,g:Prevotellaceae UCG-004,s:uncultured bacterium  
 51 OTU\_2087:k:Bacteria,p:Firmicutes,c:Clostridia,o:Lachnospirales,f:Lachnospiraceae,g:Lachnospira,s:Kineothrix  
 52 OTU\_2690:k:Bacteria,p:Bacteroidota,c:Bacteroidia,o:Bacteroidales,f:Bacteroidales RF16 group  
 53 OTU\_3171:k:Archaea,p:Halobacterota,c:Halobacteria,o:Halobacterales,f:Haloferacaceae,g:Haloquadratum  
 54 OTU\_2261:k:Bacteria,p:Proteobacteria,c:Alphaproteobacteria,o:Rhodobacterales,f:Rhodobacteraceae,g:Rubellimicrobium,s:uncultured bacterium  
 55 OTU\_2760:k:Bacteria,p:Patensibacteria,c:Gracilibacteria,o:Absconditabacteriales SR1, s:Uncultured bacterium  
 56 OTU\_4013:k:Bacteria  
 57 OTU\_3266:k:Bacteria  
 58 OTU\_3168:k:Bacteria,p:Firmicutes,c:Bacilli,o:Mycoplasmatales,f:Mycoplasmataceae,g:Ureaplasma,s:uncultured bacterium  
 59 OTU\_1646:k:Bacteria,p:Bacteroidota,c:Bacteroidia,o:Bacteroidales,f:Muribaculaceae  
 60 OTU\_498:k:Bacteria,p:Proteobacteria,c:Alphaproteobacteria,o:Caulobacterales,f:Caulobacteraceae,g:Caulobacter  
 61 OTU\_1307:k:Bacteria,p:Proteobacteria,c:Alphaproteobacteria,o:Rhodobacterales,f:Rhodobacteraceae,g:HIMB11  
 62 OTU\_1268:k:Bacteria,p:Firmicutes,c:Clostridia,o:Lachnospirales,f:Lachnospiraceae g:Lachnospira,s:uncultured bacterium  
 63 OTU\_3144:k:Bacteria,p:Patensibacteria,c:Dojkabacteria  
 64 OTU\_1096:k:Bacteria,p:Actinobacteriota,c:Actinobacteria,o:Propionibacteriales,f:Propionibacteriaceae,g:Cutibacterium  
 65 OTU\_1639:k:Bacteria,p:Patensibacteria,c:Saccharimonadia,o:Saccharimonadales  
 66 OTU\_2024:k:Bacteria,p:Proteobacteria,c:Alphaproteobacteria,o:Sphingomonadales,f:Sphingomonadaceae  
 67 OTU\_1348:k:Bacteria,p:Firmicutes,c:Clostridia  
 68 OTU\_3887:k:Bacteria,p:Firmicutes,c:Clostridia,o:Lachnospirales,f:Lachnospiraceae,g:Lachnospira,s:Lachnospiraceae bacterium S37-30-1  
 69 OTU\_2811:k:Bacteria,p:Firmicutes,c:Clostridia,o:Peptostreptococcales-Tissierellales  
 70 OTU\_4503:k:Bacteria,p:Proteobacteria,c:Gammaproteobacteria,o:Pseudomonadales,f:Moraxellaceae,g:Acinetobacter  
 71 OTU\_1251:k:Bacteria,p:Firmicutes,c:Clostridia,o:Clostridia vadinBB60 group  
 72 OTU\_1566:k:Bacteria,p:Bacteroidota,c:Bacteroidia,o:Bacteroidales,f:Muribaculaceae  
 73 OTU\_2903:k:Bacteria,p:Acidobacteriota,c:Thermoanaerobaculia,o:Thermoanaerobaculales,f:Thermoanaerobaculaceae,g:Subgroup-1  
 74 OTU\_2356:k:Bacteria,p:Firmicutes,c:Clostridia  
 75 OTU\_1535:k:Bacteria,p:Acidobacteriota,c:Vicinamibacteria,o:Subgroup-17  
 76 OTU\_2325:k:Bacteria,p:Proteobacteria,c:Alphaproteobacteria,o:Rhodobacterales,f:Rhodobacteraceae,g:Rhodobacter  
 77 OTU\_1386:k:Bacteria,p:Firmicutes,c:Clostridia,o:Clostridia UCG-014  
 78 OTU\_1493:k:Bacteria,p:Firmicutes,c:Bacilli,o:Brevibacillales,f:Brevibacillaceae,g:Brevibacillus,s:bacterium YC-LK-LKJ16  
 79 OTU\_2349:k:Bacteria,p:Bacteroidota,c:Bacteroidia,o:Bacteroidales,f:Prolixibacteraceae,g:WCHB1-32



80 OTU\_993:k:Bacteria,p:Actinobacteriota,c:Acidimicrobiia,o:IMCC26256  
 81 OTU\_1804:k:Bacteria,p:Firmicutes,c:Clostridia,o:Christensenellales,f:Christensenellaceae,g:Christensenellaceae-R-7-group  
 82 OTU\_3220:k:Bacteria,p:Proteobacteria,c:Gammaproteobacteria,o:Enterobacterales,f:Yersiniaceae,g:Rahnella,s:Rahnella aquatilis  
 83 OTU\_3468:k:Bacteria,p:Proteobacteria,c:Gammaproteobacteria,o:Enterobacterales  
 84 OTU\_1232:k:Bacteria,p:Bacteroidota,c:Bacteroidia,o:Bacteroidales,f:Barnesiellaceae,g:Barnesiella  
 85 OTU\_946:k:Bacteria,p:Bacteroidota,c:Bacteroidia,o:Flavobacteriales,f:Weeksellaceae,g:Empedobacter,s:Empedobacter brevis  
 86 OTU\_4096:k:Bacteria,p:Firmicutes,c:Clostridia,o:Clostridiales,f:Caloramatoraceae  
 87 OTU\_1908:k:Bacteria,p:Proteobacteria,c:Gammaproteobacteria,o:Burkholderiales,f:Rhodocyclaceae,g:uncultured,s:uncultured bacterium  
 88 OTU\_1909:k:Bacteria,p:Firmicutes,c:Clostridia  
 89 OTU\_1312:k:Bacteria,p:Firmicutes,c:Negativicutes,o:Veillonellales-Selenomonadales,f:Selenomonadaceae,g:Selenomonas  
 90 OTU\_2859:k:Bacteria,p:Proteobacteria,c:Alphaproteobacteria,o:Rhizobiales,f:Hyphomicrobiaceae,g:Hyphomicrobium  
 91 OTU\_940:k:Bacteria,p:Firmicutes,c:Clostridia,o:Oscillospirales,f:Ruminococcaceae,g:Paludicola,s:Paludicola psychrotolerans  
 92 OTU\_1100:k:Bacteria,p:Bacteroidota,c:Bacteroidia,o:Bacteroidales,f:Porphyromonadaceae,g:Porphyromonas,s:Porphyromonas pogonae  
 93 OTU\_2060:k:Bacteria,p:Firmicutes,c:Limnochordia  
 94 OTU\_2899:k:Bacteria,p:Acidobacteriota,c:Blastocatellia,o:11-24  
 95 OTU\_2835:k:Bacteria,p:Proteobacteria,c:Gammaproteobacteria,o:Xanthomonadales,f:Xanthomonadaceae,g:Pseudoxanthomonas  
 96 OTU\_1992:k:Bacteria,p:Sumerlaeota,c:Sumerlaeia,o:Sumerlaeales,f:Sumerlaeaceae,g:Sumerlaea,s:uncultured bacterium  
 97 OTU\_3594:k:Bacteria,p:Actinobacteriota,c:Actinobacteria,o:Micromonosporales,f:Micromonosporaceae,g:Micromonospora  
 98 OTU\_3741:k:Bacteria,p:Firmicutes,c:Negativicutes,o:Veillonellales-Selenomonadales,f:Selenomonadaceae,g:Selenomonas  
 99 OTU\_2791:k:Bacteria,p:Bacteroidota,c:Ignavibacteria,o:Ignavibacteriales  
 100 OTU\_3552:k:Bacteria,p:Actinobacteriota,c:Actinobacteria,o:Propionibacteriales,f:Propionibacteriaceae,g:Luteococcus,s:Luteococcus japonicus  
 101 OTU\_2770:k:Bacteria,p:Bacteroidota,c:Bacteroidia,o:Sphingobacteriales,f:Sphingobacteriaceae,g:Sphingobacterium,s:uncultured bacterium  
 102 OTU\_3711:k:Bacteria,p:Armatimonadota,c:Fimbriimonadia,o:Fimbriimonadales,f:Fimbriimonadaceae  
 103 OTU\_2974:k:Bacteria,p:Proteobacteria,c:Gammaproteobacteria,o:Pseudomonadales,f:Moraxellaceae,g:Acinetobacter,s:Acinetobacter-92012  
 104 OTU\_1248:k:Bacteria,p:Actinobacteriota,c:Actinobacteria,o:Frankiales,f:Geodermatophilaceae,g:Geodermatophilus  
 105 OTU\_1122:k:Bacteria,p:Desulfobacterota,c:Desulfobulbia,o:Desulfobulbales,f:Desulfocapsaceae  
 106 OTU\_1261:k:Bacteria,p:Fusobacteriota,c:Fusobacteriia,o:Fusobacteriales,f:Leptotrichiaceae,g:Leptotrichia  
 107 OTU\_1270:k:Bacteria,p:Firmicutes,c:Clostridia,o:Oscillospirales,f:Butyricicoccaceae,g:UCG-009,s:uncultured bacterium  
 108 OTU\_1937:k:Bacteria,p:Firmicutes,c:Clostridia,o:Oscillospirales,f:UCG-010  
 109 OTU\_1503:k:Bacteria,p:Firmicutes,c:Clostridia,o:Oscillospirales,f:Ruminococcaceae  
 110 OTU\_1516:k:Bacteria,p:Chloroflexi,c:Anaerolineae,o:Caldilineales,f:Caldilineaceae,g:uncultured,s:uncultured bacterium

111 OTU\_2027:k:Bacteria,p:Firmicutes,c:Bacilli,o:Lactobacillales,f:Streptococcaceae,g:Streptococcus,s:Streptococcus parauberis  
 112 OTU\_3681:k:Bacteria,p:Bacteroidota,c:Bacteroidia,o:Bacteroidales,f:Prevotellaceae,g:Prevotella,s:uncultured bacterium  
 113 OTU\_2818:k:Bacteria,p:Bacteroidota,c:Bacteroidia,o:Bacteroidales,f:Bacteroidaceae,g:Bacteroides  
 114 OTU\_690:k:Bacteria,p:Bacteroidota,c:Bacteroidia,o:Bacteroidales,f:Marinifilaceae,g:Butyrivimonas  
 115 OTU\_1277:k:Bacteria,p:Actinobacteriota,c:Acidimicrobiia,o:Microtrichales,f:Ilumatobacteraceae,g:CL500-29 marine,s:uncultured bacterium  
 116 OTU\_3551:k:Bacteria,p:Firmicutes,c:Clostridia,o:Oscillospirales,f:Oscillospiraceae,g:Colidextribacter,s:uncultured bacterium  
 117 OTU\_3556:k:Bacteria,p:Bacteroidota,c:Bacteroidia,o:Bacteroidales,f:Dysgonomonadaceae,g:Dysgonomonas  
 118 OTU\_1370:k:Bacteria,p:Deinococcota,c:Deinococci,o:Thermates,f:Thermaceae,g:Meiothermus  
 119 OTU\_1565:k:Bacteria,p:Planctomycetota,c:Planctomycetes,o:Gemmatales,f:Gemmataceae,g:uncultured  
 120 OTU\_2122:k:Bacteria,p:Bacteroidota,c:Bacteroidia,o:Cytophagales,f:Cyclobacteriaceae,g:Algoriphagus,s:uncultured bacterium  
 121 OTU\_3294:k:Bacteria,p:Proteobacteria,c:Gammaproteobacteria,o:Diplorickettsiales,f:Diplorickettsiaceae,g:Rickettsiella,s:Rickettsiella agriotidis  
 122 OTU\_2321:k:Bacteria,p:Chloroflexi,c:Anaerolineae,o:SBR1031  
 123 OTU\_913:k:Bacteria,p:Firmicutes,c:Bacilli,o:Lactobacillales,f:Carnobacteriaceae,g:Granulicatella  
 124 OTU\_3897:k:Bacteria,p:Proteobacteria,c:Gammaproteobacteria,o:Burkholderiales,f:Oxalobacteraceae,g:Massilia,s:Uncultured Oxalobacteraceae  
 125 OTU\_1483:k:Bacteria,p:Proteobacteria,c:Gammaproteobacteria,o:Pasteurellales,f:Pasteurellaceae,g:Haemophilus,s:Haemophilus haemolyticus  
 126 OTU\_1422:k:Bacteria,p:Actinobacteriota,c:Acidimicrobiia,o:Actinomarinales,f:Actinomarinaceae,g:Candidatus Actinomarina,s:uncultured bacterium  
 127 OTU\_1657:k:Bacteria,p:Deinococcota,c:Deinococci,o:Deinococcales,f:Deinococcaceae,g:Deinococcus,s:Uncultured bacterium  
 128 OTU\_3998:k:Bacteria,p:Firmicutes,c:Bacilli,o:Bacillales,f:Bacillaceae  
 129 OTU\_3544:k:Bacteria,p:Firmicutes,c:Clostridia,o:Lachnospirales,f:Lachnospiraceae,g:Lachnospiraceae NK4A136 group  
 130 OTU\_2568:k:Bacteria,p:Bacteroidota,c:Bacteroidia,o:Bacteroidales,f:Bacteroidaceae,g:Bacteroides,s:Bacteroides paurosaccharolyticus-JCM-15092  
 131 OTU\_1502:k:Bacteria,p:Actinobacteriota,c:Actinobacteria,o:Corynebacteriales,f:Corynebacteriaceae,g:Corynebacterium,s:Corynebacterium pseudodiphtheriticum  
 132 OTU\_2732:k:Bacteria,p:Bacteroidota,c:Kapabacteria,o:Kapabacteriales  
 133 OTU\_851:k:Bacteria,p:Fusobacteriota,c:Fusobacteriia,o:Fusobacteriales,f:Leptotrichiaceae,g:Leptotrichia,s:uncultured Leptotrichia  
 134 OTU\_1326:k:Bacteria,p:Firmicutes,c:Clostridia,o:Peptostreptococcales-Tissierellales  
 135 OTU\_3213:k:Bacteria,p:Bacteroidota,c:Bacteroidia,o:Flavobacteriales,f:Flavobacteriaceae,g:Flavobacterium,s:Uncultured bacterium  
 136 OTU\_3690:k:Bacteria,p:Proteobacteria,c:Gammaproteobacteria,o:Pseudomonadales,f:Moraxellaceae,g:Alkanindiges,s:uncultured bacterium  
 137 OTU\_2113:k:Bacteria,p:Firmicutes,c:Bacilli,o:Paenibacillales,f:Paenibacillaceae,g:Cohnella,s:Uncultured Cohnella  
 138 OTU\_3952:k:Bacteria,p:Firmicutes,c:Clostridia,o:Eubacteriales,f:Eubacteriaceae,g:Acetobacterium,s:Acetobacterium wieringae  
 139 OTU\_2657:k:Bacteria,p:Firmicutes,c:Thermoanaerobacteria,o:Thermoanaerobacterales,f:SRB2  
 140 OTU\_1715:k:Bacteria,p:Actinobacteriota,c:Actinobacteria,o:Propionibacteriales,f:Propionibacteriaceae  
 141 OTU\_1699:k:Bacteria,p:Actinobacteriota,c:Thermoleophilia,o:Solirubrobacterales,f:67-14

142 OTU\_2277:k:Bacteria,p:Firmicutes,c:Clostridia,o:Lachnospirales,f:Lachnospiraceae,g:Lachnospiraceae-NK4A136-group  
 143 OTU\_3188:k:Bacteria,p:Proteobacteria,c:Gammaproteobacteria,o:Pasteurellales,f:Pasteurellaceae,g:Haemophilus,s:Haemophilus parainfluenzae  
 144 OTU\_2522:k:Bacteria,p:Actinobacteriota,c:Thermoleophilia,o:Solirubrobacterales,f:67-14  
 145 OTU\_1643:k:Bacteria,p:Firmicutes,c:Clostridia,o:Oscillospirales,f:Oscillospiraceae,g:Oscillospira,s:uncultured bacterium  
 146 OTU\_3592:k:Bacteria,p:Proteobacteria,c:Gammaproteobacteria,o:Burkholderiales,f:Comamonadaceae,g:Variovorax,s:Variovorax ginsengisoli  
 147 OTU\_1490:k:Bacteria,p:Acidobacteriota,c:Vicinamibacteria,o:Vicinamibacterales,f:uncultured  
 148 OTU\_3167:k:Bacteria,p:Proteobacteria,c:Alphaproteobacteria,o:Sphingomonadales,f:Sphingomonadaceae,g:Sphingomonas  
 149 OTU\_1866:k:Bacteria,p:Deinococcota,c:Deinococci,o:Deinococcales,f:Deinococcaceae,g:Deinococcus,s:Uncultured  
 150 OTU\_2310:k:Bacteria,p:Proteobacteria,c:Gammaproteobacteria,o:Gammaproteobacteria Incertae Sedis,f:Unknown-Family,g:Candidatus Berkiella,s:Uncultured  
 151 OTU\_3933:k:Bacteria,p:Deinococcota,c:Deinococci,o:Deinococcales,f:Deinococcaceae,g:Deinococcus,s:Deinococcus 3B1  
 152 OTU\_4238:k:Bacteria,p:Bacteroidota,c:Bacteroidia,o:Bacteroidales,f:Prevotellaceae,g:Prevotella,s:uncultured bacterium  
 153 OTU\_2984:k:Bacteria,p:Firmicutes,c:Bacilli,o:Lactobacillales,f:Lactobacillaceae,g:Lactobacillus  
 154 OTU\_1520:k:Bacteria,p:Actinobacteriota,c:Actinobacteria,o:Micrococcales  
 155 OTU\_2501:k:Bacteria,p:Proteobacteria,c:Gammaproteobacteria,o:Burkholderiales,f:Oxalobacteraceae,g:Massilia,s:Uncultured  
 156 OTU\_1821:k:Bacteria,p:Bacteroidota,c:Bacteroidia,o:Flavobacteriales,f:Weeksellaceae,g:Chryseobacterium  
 157 OTU\_1587:k:Bacteria,p:Proteobacteria,c:Alphaproteobacteria,o:Sphingomonadales,f:Sphingomonadaceae,g:Altererythrobacter,s:uncultured  
 158 OTU\_1010:k:Bacteria,p:Bacteroidota,c:Bacteroidia,o:Bacteroidales,f:Prevotellaceae,g:Prevotellaceae-Ga6A1-group,s:uncultured  
 159 OTU\_3622:k:Bacteria,p:Actinobacteriota,c:Actinobacteria,o:Propionibacteriales,f:Nocardioidaceae,g:Aeromicrobium  
 160 OTU\_2473:k:Bacteria,p:Desulfobacterota,c:Desulfobulbia,o:Desulfobulbales,f:Desulfobulbaceae,g:Desulfobulbus,s:uncultured  
 161 OTU\_3567:k:Bacteria,p:Proteobacteria,c:Gammaproteobacteria,o:Pasteurellales,f:Pasteurellaceae,s:Actinobacillus porcinus  
 162 OTU\_2270:k:Bacteria,p:Bacteroidota,c:Bacteroidia,o:Bacteroidales,f:Muribaculaceae  
 163 OTU\_2115:k:Bacteria,p:Proteobacteria,c:Gammaproteobacteria,o:Burkholderiales,f:Comamonadaceae  
 164 OTU\_2416:k:Bacteria,p:Firmicutes,c:Bacilli,o:Lactobacillales,f:Lactobacillaceae,g:Lactobacillus  
 165 OTU\_3598:k:Bacteria,p:Firmicutes,c:Clostridia,o:Oscillospirales,f:Ruminococcaceae,g:uncultured,s:uncultured bacterium  
 166 OTU\_4306:k:Bacteria,p:Bacteroidota,c:Bacteroidia,o:Bacteroidales,f:Prevotellaceae,g:Prevotellaceae-NK3B31-group,s:uncultured  
 167 OTU\_1702:k:Bacteria,p:Proteobacteria,c:Alphaproteobacteria,o:Sphingomonadales,f:Sphingomonadaceae  
 168 OTU\_2459:k:Bacteria,p:Bacteroidota,c:Bacteroidia,o:Cytophagales,f:Spirosomaceae,g:Dyadobacter  
 169 OTU\_2843:k:Bacteria,p:Bacteroidota,c:Bacteroidia,o:Chitinophagales,f:Saprospiraceae  
 170 OTU\_2806:k:Bacteria,p:Firmicutes,c:Bacilli,o:Erysipelotrichales,f:Erysipelatoclostridiaceae,g:Candidatus Stoquefichus,s:Longibaculum muris  
 171 OTU\_1015:k:Bacteria,p:Proteobacteria,c:Gammaproteobacteria,o:Burkholderiales,f:Sutterellaceae,g:Sutterella  
 172 OTU\_975:k:Bacteria,p:Actinobacteriota,c:Actinobacteria,o:Actinomycetales,f:Actinomycetaceae,g:F0332,s:uncultured bacterium

173 OTU\_2173:k:Bacteria,p:Firmicutes,c:Bacilli,o:Bacillales,f:Planococcaceae,g:Sporosarcina  
 174 OTU\_650:k:Bacteria,p:Proteobacteria,c:Alphaproteobacteria,o:Rickettsiales,f:Rickettsiaceae,g:Rickettsia,s:Rickettsia endosymbiont  
 175 OTU\_1429:k:Bacteria,p:Proteobacteria,c:Alphaproteobacteria,o:Rhizobiales,f:Beijerinckiaceae,g:uncultured  
 176 OTU\_1375:k:Bacteria,p:Actinobacteriota,c:Actinobacteria,o:Micrococcales,f:Microbacteriaceae,g:Agromyces,s:Agromyces iriomotensis  
 177 OTU\_836:k:Bacteria,p:Proteobacteria,c:Gammaproteobacteria,o:Burkholderiales,f:Neisseriaceae,g:Vitreoscilla,s:uncultured Vitreoscilla  
 178 OTU\_1142:k:Bacteria,p:Firmicutes,c:Clostridia,o:Lachnospirales,f:Lachnospiraceae,g:Lachnospiraceae NK4A136 group,s:uncultured  
 179 OTU\_1746:k:Bacteria,p:Verrucomicrobiota,c:Chlamydiae,o:Chlamydiales,f:Parachlamydiaceae,g:Neochlamydia  
 180 OTU\_838:k:Bacteria,p:Firmicutes,c:Clostridia,o:Clostridiales,f:Clostridiaceae,g:Proteiniclasticum  
 181 OTU\_1432:k:Bacteria,p:Firmicutes,c:Clostridia,o:Lachnospirales,f:Lachnospiraceae,g:Lachnospira,s:uncultured bacterium  
 182 OTU\_1183:k:Bacteria,p:Firmicutes,c:Clostridia,o:Oscillospirales,f:Ruminococcaceae,g:Incertae Sedis,s:Uncultured bacterium  
 183 OTU\_1878:k:Bacteria,p:Firmicutes,c:Clostridia,o:Eubacteriales,f:Anaerofustaceae,g:Anaerofustis,s:uncultured bacterium  
 184 OTU\_1344:k:Bacteria,p:Bacteroidota,c:Bacteroidia,o:Sphingobacteriales,f:Sphingobacteriaceae,g:Sphingobacterium,s:Sphingobacterium shayense  
 185 OTU\_1714:k:Bacteria,p:Actinobacteriota,c:Coriobacteriia,o:OPB41  
 186 OTU\_1019:k:Bacteria,p:Bacteroidota,c:Bacteroidia,o:Flavobacteriales,f:Flavobacteriaceae,g:Capnocytophaga  
 187 OTU\_2090:k:Bacteria,p:Bdellovibrionota,c:Bdellovibrionia,o:Bacteriovoracales,f:Bacteriovoraceae,g:Peredibacter,s:Uncultured bacterium  
 188 OTU\_1573:k:Bacteria,p:Firmicutes,c:Clostridia,o:Christensenellales,f:Christensenellaceae,g:uncultured,s:uncultured bacterium  
 189 OTU\_1910:k:Bacteria,p:Bacteroidota,c:Bacteroidia,o:Bacteroidales,f:Bacteroidaceae,g:Bacteroides  
 190 OTU\_1480:k:Bacteria,p:Proteobacteria,c:Alphaproteobacteria,o:Acetobacterales,f:Acetobacteraceae,g:uncultured,s:uncultured bacterium  
 191 OTU\_999:k:Bacteria,p:Actinobacteriota,c:Actinobacteria  
 192 OTU\_1634:k:Bacteria,p:Bacteroidota,c:Bacteroidia,o:Bacteroidales,f:Rikenellaceae,g:Alistipes,s:uncultured  
 193 OTU\_1434:k:Bacteria,p:Verrucomicrobiota,c:Verrucomicrobiae,o:Verrucomicrobiales,f:Verrucomicrobiaceae,g:uncultured,s:uncultured verrucomicrobium  
 194 OTU\_1445:k:Bacteria,p:Firmicutes,c:Clostridia,o:Christensenellales,f:Christensenellaceae,g:uncultured,s:uncultured bacterium  
 195 OTU\_2988:k:Bacteria,p:Actinobacteriota,c:Actinobacteria,o:Propionibacteriales,f:Propionibacteriaceae  
 196 OTU\_2643:k:Bacteria,p:Campylobacterota,c:Campylobacteriia,o:Campylobacteriales,f:Campylobacteraceae,g:Campylobacter,s:Campylobacter gracilis  
 197 OTU\_4173:k:Bacteria,p:Bacteroidota,c:Bacteroidia,o:Flavobacteriales,f:Flavobacteriaceae,g:Flavobacterium,s:Flavobacterium V22012  
 198 OTU\_4141:k:Bacteria,p:Bacteroidota,c:Bacteroidia,o:Bacteroidales,f:Dysgonomonadaceae,g:Dysgonomonas  
 199 OTU\_3993:k:Bacteria,p:Bacteroidota,c:Bacteroidia,o:Bacteroidales,f:Marinifilaceae,g:Butyricimonas  
 200 OTU\_1707:k:Bacteria,p:Deinococcota,c:Deinococci,o:Deinococcales,f:Deinococcaceae,g:Deinococcus,s:Deinococcus geothermalis  
 201 OTU\_3597:k:Bacteria,p:Firmicutes,c:Clostridia,o:Lachnospirales,f:Lachnospiraceae,g:Lachnospira,s:uncultured bacterium  
 202 OTU\_4290:k:Bacteria,p:Bacteroidota,c:Bacteroidia,o:Bacteroidales,f:Prevotellaceae,g:Prevotellaceae UCG-003

---

**Keynote:** k: kingdom, p: phylum, c: class, o: order, f: family, g: genus, s: species

**Supplementary Table S8. Unique 216 OTUs in stomach samples, contributing to variance in the overall sequences.**

| No. | OTUs descriptions                                                                                                                         |
|-----|-------------------------------------------------------------------------------------------------------------------------------------------|
| 1   | OTU_2550:k:Bacteria,p:Bacteroidota,c:Bacteroidia,o:Bacteroidales,f:Prevotellaceae,g:Prevotella,s:uncultured bacterium                     |
| 2   | OTU_3023:k:Bacteria,p:Actinobacteriota,c:Actinobacteria,o:Pseudonocardiales,f:Pseudonocardiaceae                                          |
| 3   | OTU_1667:k:Bacteria,p:Actinobacteriota,c:Coriobacteriia,o:OPB41                                                                           |
| 4   | OTU_2365:k:Bacteria,p:Actinobacteriota,c:Actinobacteria,o:Frankiales,f:Nakamurellaceae,g:Nakamurella,s:Uncultured                         |
| 5   | OTU_905:k:Bacteria,p:Firmicutes,c:Clostridia,o:Oscillospirales,f:UCG-010                                                                  |
| 6   | OTU_1955:k:Bacteria,p:Bacteroidota,c:Bacteroidia,o:Flavobacteriales,f:Flavobacteriaceae,g:Flavobacterium                                  |
| 7   | OTU_4212:k:Bacteria,p:Chloroflexi,c:Chloroflexia,o:Chloroflexales,f:Roseiflexaceae                                                        |
| 8   | OTU_3201:k:Bacteria,p:Proteobacteria,c:Alphaproteobacteria,o:Tistrellales,f:Geminicoccaceae,g:Candidatus Alysiosphaera                    |
| 9   | OTU_2633:k:Bacteria,p:Bacteroidota,c:Bacteroidia,o:Flavobacteriales,f:Flavobacteriaceae,g:Flavobacterium                                  |
| 10  | OTU_1991:k:Bacteria,p:Proteobacteria,c:Gammaproteobacteria,o:Aeromonadales,f:Aeromonadaceae,g:Aeromonas                                   |
| 11  | OTU_2936:k:Bacteria,p:Bacteroidota,c:Bacteroidia,o:Chitinophagales,f:Chitinophagaceae                                                     |
| 12  | OTU_4305:k:Bacteria,p:Chloroflexi,c:JG30-KF-CM66                                                                                          |
| 13  | OTU_3565:k:Bacteria,p:Firmicutes,c:Clostridia,o:Monoglobales,f:Monoglobaceae,g:Monoglobus,s:uncultured bacterium                          |
| 14  | OTU_4050:k:Bacteria,p:Proteobacteria,c:Alphaproteobacteria,o:Ferrovibrionales,g:Taonella,s:Taonella mepensis                              |
| 15  | OTU_3097:k:Bacteria,p:Bacteroidota,c:Bacteroidia,o:Bacteroidales,f:Prevotellaceae,g:Prevotella                                            |
| 16  | OTU_1898:k:Bacteria,p:Actinobacteriota,c:Actinobacteria,o:Propionibacteriales,f:Nocardioidaceae,g:Nocardioides,s:uncultured bacterium     |
| 17  | OTU_2298:k:Bacteria,p:Firmicutes,c:Bacilli,o:Lactobacillales,f:Lactobacillaceae,g:Lactobacillus,s:Uncultured bacterium                    |
| 18  | OTU_1970:k:Bacteria,p:Chloroflexi,c:Chloroflexia,o:Thermomicrobiales,f:JG30-KF-CM45                                                       |
| 19  | OTU_2521:k:Bacteria,p:Actinobacteriota,c:Thermoleophilia,o:Solirubrobacterales,f:67-14                                                    |
| 20  | OTU_3850:k:Bacteria,p:Proteobacteria,c:Alphaproteobacteria,o:Rhodobacterales,f:Rhodobacteraceae                                           |
| 21  | OTU_4047:k:Bacteria,p:Actinobacteriota,c:Actinobacteria,o:Corynebacteriales,f:Nocardiaceae,g:Rhodococcus,s:Rhodococcus corynebacterioides |
| 22  | OTU_1462:k:Bacteria,p:Bacteroidota,c:Bacteroidia,o:Bacteroidales,f:Rikenellaceae,g:Alistipes                                              |
| 23  | OTU_3564:k:Bacteria,p:Firmicutes,c:Bacilli,o:Lactobacillales,f:Lactobacillaceae,g:Lactobacillus,s:Uncultured bacterium                    |
| 24  | OTU_3628:k:Bacteria,p:Firmicutes,c:Bacilli,o:Thermoactinomycetales,f:Thermoactinomycetaceae,g:Kroppenstedtia                              |
| 25  | OTU_2982:k:Bacteria,p:Bacteroidota,c:Bacteroidia,o:Bacteroidales,f:Muribaculaceae                                                         |

26 OTU\_3573:k:Bacteria,p:Firmicutes,c:Bacilli  
 27 OTU\_3096:k:Bacteria,p:Actinobacteriota,c:Actinobacteria,o:Micrococcales  
 28 OTU\_1935:k:Bacteria,p:Actinobacteriota,c:Actinobacteria,o:Actinomycetales,f:Actinomycetaceae,g:Actinomyces,s:Actinomyces gerencseriae  
 29 OTU\_3140:k:Bacteria  
 30 OTU\_4115:k:Bacteria,p:Proteobacteria,c:Alphaproteobacteria,o:Rhodospirillales,f:uncultured  
 31 OTU\_3893:k:Bacteria,p:Firmicutes,c:Clostridia,o:Oscillospirales,f:[Eubacterium]-coprostanoligenes group  
 32 OTU\_1831:k:Bacteria,p:Firmicutes,c:Clostridia,o:Lachnospirales,f:Lachnospiraceae,g:[Eubacterium]-eligens group  
 33 OTU\_4219:k:Bacteria,p:Firmicutes,c:Clostridia,o:Oscillospirales,f:Oscillospiraceae,g:uncultured,s:uncultured bacterium  
 34 OTU\_3392:k:Bacteria,p:Firmicutes,c:Clostridia,o:Lachnospirales,f:Lachnospiraceae  
 35 OTU\_1849:k:Bacteria,p:Firmicutes,c:Negativicutes,o:Veillonellales-Selenomonadales,f:Sporomusaceae,g:Anaeromusa-Anaerococcus,s:uncultured bacterium  
 36 OTU\_2223:k:Bacteria,p:Bacteroidota,c:Bacteroidia,o:Bacteroidales,f:Rikenellaceae  
 37 OTU\_892:k:Bacteria,p:Deinococcota,c:Deinococci,o:Deinococcales,f:Deinococcaceae,g:Deinococcus,s:Deinococcus J16OP19  
 38 OTU\_4042:k:Bacteria,p:Bacteroidota,c:Bacteroidia,o:Bacteroidales,f:Muribaculaceae  
 39 OTU\_1438:k:Bacteria,p:Firmicutes,c:Clostridia,o:Monoglobales,f:Monoglobaceae,g:Monoglobus,s:uncultured  
 40 OTU\_2535:k:Bacteria,p:Firmicutes,c:Clostridia,o:Clostridia UCG-014  
 41 OTU\_1839:k:Bacteria,p:Firmicutes,c:Clostridia,o:Lachnospirales,f:Lachnospiraceae,g:Lachnospira  
 42 OTU\_1563:k:Bacteria,p:Firmicutes,c:Clostridia,o:Lachnospirales,f:Lachnospiraceae,g:Oribacterium,s:uncultured bacterium  
 43 OTU\_4008:k:Bacteria,p:Firmicutes,c:Clostridia,o:Christensenellales,f:Christensenellaceae,g:Christensenellaceae-R-7-group,s:uncultured bacterium  
 44 OTU\_2553:k:Bacteria,p:Chloroflexi,c:Dehalococcoidia,o:Dehalococcoidales,f:Dehalococcoidaceae,g:Dehalococcoides,s:Dehalococcoides mccartyi  
 45 OTU\_4000:k:Bacteria,p:Bacteroidota,c:Bacteroidia,o:Bacteroidales,f:Prevotellaceae,g:Alloprevotella,s:uncultured bacterium  
 46 OTU\_4421:k:Bacteria,p:Actinobacteriota,c:Actinobacteria,o:Micrococcales,f:Micrococcaceae  
 47 OTU\_1886:k:Bacteria,p:Firmicutes,c:Clostridia,o:Oscillospirales,f:Butyrivibrionaceae,g:UCG-009,s:uncultured bacterium  
 48 OTU\_3975:k:Bacteria,p:Firmicutes,c:Bacilli,o:Lactobacillales,f:Lactobacillaceae,g:Lactobacillus,s:Lactobacillus dextrinicus  
 49 OTU\_3327:k:Bacteria,p:Proteobacteria,c:Alphaproteobacteria,o:Rhodospirillales,f:uncultured  
 50 OTU\_1396:k:Bacteria,p:Firmicutes,c:Clostridia,o:Clostridiales,f:Clostridiaceae,g:Clostridium-sensu-stricto-7,s:uncultured  
 51 OTU\_3956:k:Bacteria,p:Firmicutes,c:Clostridia,o:Oscillospirales,f:Ruminococcaceae,g:Anaerofilum  
 52 OTU\_2467:k:Bacteria,p:Firmicutes,c:Clostridia,o:Lachnospirales,f:Lachnospiraceae  
 53 OTU\_3963:k:Bacteria,p:Actinobacteriota,c:Coriobacteriia,o:Coriobacteriales,f:Eggerthellaceae  
 54 OTU\_4504:k:Bacteria,p:Actinobacteriota,c:Actinobacteria,o:Actinomycetales,f:Actinomycetaceae,g:Actinomyces  
 55 OTU\_2021:k:Bacteria,p:Firmicutes,c:Bacilli,o:Lactobacillales

56 OTU\_3404:k:Bacteria,p:Bacteroidota,c:Bacteroidia,o:Bacteroidales,f:Muribaculaceae  
 57 OTU\_2931:k:Bacteria,p:Proteobacteria,c:Gammaproteobacteria,o:Cardiobacteriales,f:Cardiobacteriaceae,g:Cardiobacterium  
 58 OTU\_3844:k:Bacteria,p:Bacteroidota,c:Bacteroidia,o:Bacteroidales  
 59 OTU\_4296:k:Bacteria  
 60 OTU\_3978:k:Bacteria,p:Cyanobacteria,c:Cyanobacteriia,o:Phormidesmiales,f:Phormidesmiaceae,g:Phormidesmis ANT.LACV5.1  
 61 OTU\_4310:k:Bacteria,p:Firmicutes,c:Clostridia,o:Clostridiales,f:Clostridiaceae,g:Youngiibacter,s:Youngiibacter multivorans  
 62 OTU\_945:k:Bacteria,p:Bacteroidota,c:Bacteroidia,o:Flavobacteriales,f:Flavobacteriaceae,g:Capnocytophaga  
 63 OTU\_4442:k:Bacteria,p:Firmicutes,c:Clostridia,o:Lachnospirales,f:Lachnospiraceae  
 64 OTU\_4402:k:Bacteria,p:Firmicutes,c:Clostridia,o:Lachnospirales,f:Lachnospiraceae  
 65 OTU\_2328:k:Bacteria,p:Firmicutes,c:Clostridia,o:Lachnospirales,f:Lachnospiraceae,g:Blautia,s:uncultured bacterium  
 66 OTU\_2248:k:Bacteria,p:Firmicutes,c:Clostridia,o:Oscillospirales,f:UCG-010  
 67 OTU\_1700:k:Bacteria  
 68 OTU\_2586:k:Bacteria,p:Firmicutes,c:Clostridia,o:Clostridiales,f:Clostridiaceae,g:Clostridium-sensu-stricto-8,s:Unculture  
 69 OTU\_1926:k:Bacteria,p:Desulfobacterota,c:Desulfobulbia,o:Desulfobulbales,f:Desulfobulbaceae,g:uncultured,s:uncultured bacterium  
 70 OTU\_1815:k:Bacteria,p:Cyanobacteria,c:Cyanobacteriia,o:Synechococcales,f:Cyanobiaceae,g:Cyanobium PCC-6307  
 71 OTU\_2186:k:Bacteria,p:Acidobacteriota,c:Vicinamibacteria,o:Vicinamibacteriales,f:Vicinamibacteraceae  
 72 OTU\_3812:k:Bacteria,p:Acidobacteriota  
 73 OTU\_1950:k:Bacteria,p:Proteobacteria,c:Gammaproteobacteria,o:Burkholderiales  
 74 OTU\_2519:k:Bacteria,p:Actinobacteriota,c:Coriobacteriia,o:Coriobacteriales,f:Eggerthellaceae  
 75 OTU\_2042:k:Bacteria,p:Nitrospirota,c:Thermodesulfovibrionia,o:uncultured  
 76 OTU\_3319:k:Bacteria  
 77 OTU\_2262:k:Bacteria,p:Chloroflexi,c:Anaerolineae,o:ADurb.Bin180  
 78 OTU\_4069:k:Bacteria  
 79 OTU\_1475:k:Bacteria,p:Firmicutes,c:Clostridia,o:Lachnospirales,f:Defluviitaleaceae,g:Defluviitaleaceae UCG-011,s:uncultured bacterium  
 80 OTU\_4404:k:Bacteria,p:Bacteroidota,c:Bacteroidia,o:Bacteroidales,f:Muribaculaceae  
 81 OTU\_4150:k:Bacteria,p:Firmicutes,c:Clostridia,o:Lachnospirales,f:Lachnospiraceae  
 82 OTU\_1427:k:Bacteria,p:Firmicutes,c:Clostridia  
 83 OTU\_4092:k:Bacteria,p:Firmicutes,c:Bacilli  
 84 OTU\_4093:k:Bacteria  
 85 OTU\_2547:k:Bacteria,p:Firmicutes,c:Clostridia,o:Christensenellales,f:Christensenellaceae,g:Christensenella,s:Christensenella minuta  
 86 OTU\_4007:k:Bacteria

87 OTU\_1820:k:Bacteria,p:Firmicutes,c:Clostridia,o:Peptostreptococcales-Tissierellales,f:Anaerovoracaceae,g:[Eubacterium]-nodatum  
 88 OTU\_4509:k:Bacteria,p:Firmicutes,c:Clostridia,o:Oscillospirales,f:Oscillospiraceae  
 89 OTU\_4005:k:Bacteria  
 90 OTU\_2228:k:Bacteria,p:Bacteroidota,c:Bacteroidia,o:Bacteroidales,f:Muribaculaceae  
 91 OTU\_1282:k:Bacteria,p:Firmicutes,c:Bacilli,o:Erysipelotrichales,f:Erysipelotrichaceae,g:Clostridium innocuum  
 92 OTU\_3006:k:Bacteria,p:Actinobacteriota,c:Actinobacteria  
 93 OTU\_1524:k:Bacteria,p:Bacteroidota,c:Bacteroidia,o:Bacteroidales,f:Muribaculaceae  
 94 OTU\_3992:k:Bacteria,p:Firmicutes,c:Clostridia,o:Lachnospirales,f:Lachnospiraceae  
 95 OTU\_3466:k:Bacteria,p:Firmicutes,c:Clostridia,o:Lachnospirales,f:Lachnospiraceae  
 96 OTU\_2029:k:Bacteria,p:Firmicutes,c:Bacilli,o:Erysipelotrichales,f:Erysipelatoclostridiaceae  
 97 OTU\_3008:k:Bacteria,p:Firmicutes  
 98 OTU\_4010:k:Bacteria,p:Firmicutes,c:Clostridia,o:Lachnospirales,f:Lachnospiraceae  
 99 OTU\_2374:k:Bacteria,p:Firmicutes,c:Clostridia,o:Lachnospirales,f:Lachnospiraceae  
 100 OTU\_1860:k:Bacteria,p:Firmicutes,c:Clostridia,o:Oscillospirales,f:Oscillospiraceae,g:NK4A214 group  
 101 OTU\_3824:k:Bacteria,p:Firmicutes,c:Clostridia,o:Peptostreptococcales-Tissierellales,f:Anaerovoracaceae  
 102 OTU\_3852:k:Bacteria,p:Firmicutes,c:Clostridia,o:Lachnospirales,f:Lachnospiraceae  
 103 OTU\_4480:k:Bacteria,p:Firmicutes,c:Clostridia,o:Oscillospirales,f:Ruminococcaceae,g:uncultured,s:uncultured organism  
 104 OTU\_3073:k:Bacteria,p:Bacteroidota,c:Bacteroidia,o:Bacteroidales,f:Muribaculaceae  
 105 OTU\_3003:k:Bacteria,p:Bacteroidota,c:Bacteroidia,o:Bacteroidales  
 106 OTU\_4454:k:Bacteria,p:Firmicutes,c:Clostridia,o:Lachnospirales,f:Lachnospiraceae  
 107 OTU\_4453:k:Bacteria,p:Bacteroidota,c:Bacteroidia,o:Bacteroidales,f:Muribaculaceae  
 108 OTU\_2998:k:Bacteria,p:Firmicutes,c:Clostridia,o:Lachnospirales,f:Lachnospiraceae,g:Howardella  
 109 OTU\_4015:k:Bacteria,p:Firmicutes,c:Clostridia,o:Lachnospirales,f:Lachnospiraceae  
 110 OTU\_2495:k:Bacteria  
 111 OTU\_3980:k:Bacteria,p:Firmicutes,c:Bacilli,o:Lactobacillales,f:Lactobacillaceae,g:Lactobacillus,s:Uncultured Lactobacillus  
 112 OTU\_2558:k:Bacteria,p:Firmicutes,c:Clostridia,o:Oscillospirales,f:Ethanoligenenaceae,g:Acetanaerobacterium,s:uncultured bacterium  
 113 OTU\_1808:k:Bacteria,p:Actinobacteriota,c:Actinobacteria,o:Corynebacteriales,f:Corynebacteriaceae,g:Corynebacterium,s:Uncultured bacterium  
 114 OTU\_2575:k:Bacteria,p:Firmicutes,c:Clostridia,o:Lachnospirales,f:Lachnospiraceae  
 115 OTU\_3090:k:Bacteria,p:Firmicutes,c:Bacilli,o:Lactobacillales,f:Lactobacillaceae,g:Lactobacillus,s:Uncultured bacterium  
 116 OTU\_4514:k:Bacteria,p:Firmicutes  
 117 OTU\_3088:k:Bacteria,p:Firmicutes,c:Clostridia,o:Oscillospirales,g:Hydrogenoanaerobacterium,s:uncultured Clostridium



118 OTU\_3965:k:Bacteria,p:Bacteroidota,c:Bacteroidia,o:Bacteroidales,f:Muribaculaceae  
 119 OTU\_4289:k:Bacteria,p:Bacteroidota,c:Bacteroidia,o:Bacteroidales,f:Muribaculaceae  
 120 OTU\_675:k:Bacteria,p:Firmicutes,c:Clostridia,o:Lachnospirales,f:Lachnospiraceae  
 121 OTU\_4218:k:Bacteria  
 122 OTU\_4329:k:Bacteria,p:Firmicutes,c:Clostridia,o:Lachnospirales,f:Lachnospiraceae,g:Blautia,s:uncultured bacterium  
 123 OTU\_4274:k:Bacteria,p:Bacteroidota,c:Bacteroidia,o:Bacteroidales,f:Muribaculaceae  
 124 OTU\_3083:k:Bacteria,p:Firmicutes,c:Clostridia,o:Lachnospirales,f:Lachnospiraceae  
 125 OTU\_4324:k:Bacteria  
 126 OTU\_3077:k:Bacteria  
 127 OTU\_3078:k:Bacteria,p:Firmicutes,c:Clostridia,o:Lachnospirales,f:Lachnospiraceae  
 128 OTU\_2909:k:Bacteria,p:Bacteroidota,c:Bacteroidia,o:Bacteroidales,f:Bacteroidaceae,g:Bacteroides  
 129 OTU\_3767:k:Bacteria,p:Firmicutes,c:Clostridia,o:Eubacteriales,f:Anaerofustaceae,g:Anaerofustis  
 130 OTU\_4207:k:Bacteria,p:Bacteroidota,c:Bacteroidia,o:Bacteroidales,f:Rikenellaceae,g:Rikenellaceae RC9 gut group  
 131 OTU\_2676:k:Bacteria,p:Firmicutes  
 132 OTU\_2714:k:Bacteria,p:Firmicutes,c:Bacilli,o:Lactobacillales,f:Streptococcaceae,g:Streptococcus,s:Uncultured Streptococcus  
 133 OTU\_3045:k:Bacteria,p:Firmicutes,c:Bacilli,o:Lactobacillales,f:Lactobacillaceae,g:Lactobacillus,s:Lactobacillus mucosae  
 134 OTU\_3969:k:Bacteria,p:Firmicutes,c:Clostridia,o:Lachnospirales,f:Lachnospiraceae  
 135 OTU\_3973:k:Bacteria,p:Firmicutes  
 136 OTU\_2979:k:Bacteria,p:Bacteroidota,c:Bacteroidia,o:Bacteroidales,f:Muribaculaceae  
 137 OTU\_4354:k:Bacteria,p:Firmicutes,c:Clostridia,o:Oscillospirales,f:Oscillospiraceae,g:Papillibacter,s:uncultured bacterium  
 138 OTU\_2992:k:Bacteria,p:Firmicutes  
 139 OTU\_1509:k:Bacteria,p:Firmicutes,c:Clostridia,o:Lachnospirales,f:Lachnospiraceae,g:Lachnospiraceae UCG-001  
 140 OTU\_2593:k:Bacteria,p:Firmicutes,c:Bacilli  
 141 OTU\_3826:k:Bacteria,p:Firmicutes,c:Clostridia  
 142 OTU\_2967:k:Bacteria,p:Firmicutes  
 143 OTU\_4459:k:Bacteria,p:Firmicutes,c:Clostridia  
 144 OTU\_2978:k:Bacteria  
 145 OTU\_3818:k:Bacteria,p:Firmicutes,c:Clostridia,o:Lachnospirales,f:Lachnospiraceae  
 146 OTU\_4077:k:Bacteria,p:Firmicutes  
 147 OTU\_3808:k:Bacteria,p:Firmicutes,c:Clostridia,o:Lachnospirales,f:Lachnospiraceae,g:Eubacterium-xylanophilum,s:uncultured bacterium  
 148 OTU\_3782:k:Bacteria,p:Firmicutes,c:Clostridia,o:Lachnospirales,f:Lachnospiraceae

149 OTU\_3024:k:Bacteria,p:Firmicutes,c:Clostridia,o:Oscillospirales,f:Ruminococcaceae  
 150 OTU\_3036:k:Bacteria,p:Firmicutes,c:Clostridia,o:Lachnospirales,f:Lachnospiraceae  
 151 OTU\_4111:k:Bacteria,p:Firmicutes  
 152 OTU\_3833:k:Bacteria  
 153 OTU\_716:k:Bacteria,p:Actinobacteriota,c:Actinobacteria,o:Micrococcales  
 154 OTU\_978:k:Bacteria,p:Bacteroidota,c:Bacteroidia,o:Sphingobacteriales,f:env.OPS 17  
 155 OTU\_1691:k:Bacteria,p:Proteobacteria,c:Gammaproteobacteria,o:Enterobacterales,f:Morganellaceae,g:Morganella  
 156 OTU\_625:k:Bacteria,p:Proteobacteria,c:Alphaproteobacteria,o:Caulobacterales,f:Caulobacteraceae,g:Brevundimonas  
 157 OTU\_1738:k:Bacteria,p:Proteobacteria,c:Gammaproteobacteria,o:Burkholderiales,f:SC-I-84  
 158 OTU\_1555:k:Bacteria,p:Proteobacteria,c:Gammaproteobacteria,o:Pasteurellales,f:Pasteurellaceae,g:Aggregatibacter,s:Aggregatibacter segnis  
 159 OTU\_1126:k:Bacteria,p:Firmicutes,c:Bacilli,o:Lactobacillales,f:Carnobacteriaceae  
 160 OTU\_1896:k:Bacteria,p:Firmicutes,c:Clostridia,o:Peptostreptococcales-Tissierellales,g:Sporanaerobacter,s:Sporanaerobacter acetigenes  
 161 OTU\_2656:k:Bacteria,p:Proteobacteria,c:Gammaproteobacteria,o:Burkholderiales,f:Neisseriaceae,g:Neisseria,s:Neisseria zaloph  
 162 OTU\_1466:k:Bacteria,p:Proteobacteria,c:Gammaproteobacteria,o:Burkholderiales,f:Comamonadaceae,g:Methylibium,s:Methylibium petroleiphilum  
 163 OTU\_3835:k:Bacteria,p:Actinobacteriota,c:Actinobacteria,o:Corynebacteriales,f:Corynebacteriaceae,g:Corynebacterium,s:Uncultured bacterium  
 164 OTU\_1759:k:Bacteria,p:Desulfobacterota,c:Desulfuromonadia  
 165 OTU\_2584:k:Bacteria,p:Deinococcota,c:Deinococci,o:Deinococcales,f:Deinococcaceae,g:Deinococcus  
 166 OTU\_3719:k:Bacteria,p:Firmicutes,c:Clostridia,o:Lachnospirales,f:Lachnospiraceae  
 167 OTU\_1032:k:Bacteria,p:Firmicutes,c:Clostridia,o:Oscillospirales,f:UCG-010  
 168 OTU\_2112:k:Bacteria,p:Firmicutes,c:Clostridia,o:Monoglobales,f:Monoglobaceae,g:Monoglobus,s:Uncultured  
 169 OTU\_1118:k:Bacteria,p:Firmicutes,c:Clostridia,o:Lachnospirales,f:Lachnospiraceae,g:uncultured,s:uncultured bacterium  
 170 OTU\_3131:k:Bacteria,p:Firmicutes,c:Clostridia,o:Lachnospirales,f:Lachnospiraceae,g:uncultured,s:uncultured bacterium  
 171 OTU\_1832:k:Bacteria,p:Firmicutes,c:Clostridia,o:Clostridia vadinBB60 group  
 172 OTU\_3703:k:Bacteria,p:Firmicutes,c:Clostridia,o:Lachnospirales,f:Lachnospiraceae  
 173 OTU\_1455:k:Bacteria,p:Firmicutes,c:Clostridia,o:Lachnospirales,f:Lachnospiraceae,g:uncultured,s:uncultured bacterium  
 174 OTU\_3673:k:Bacteria,p:Actinobacteriota,c:Actinobacteria,o:Micrococcales,f:Dermatophilaceae,g:uncultured,s:uncultured actinobacterium  
 175 OTU\_2479:k:Bacteria,p:Firmicutes,c:Clostridia,o:Peptostreptococcales-Tissierellales,g:Tissierella,s:uncultured bacterium  
 176 OTU\_3105:k:Bacteria,p:Firmicutes,c:Clostridia,o:Oscillospirales,f:Butyricicoccaceae,g:UCG-009,s:uncultured bacterium  
 177 OTU\_4080:k:Bacteria,p:Actinobacteriota,c:Thermoleophilia,o:Solirubrobacterales,f:Solirubrobacteraceae,g:Patulibacter  
 178 OTU\_3114:k:Bacteria,p:Cyanobacteria,c:Cyanobacteriia,o:Cyanobacteriales,f:Nostocaceae,g:uncultured,s:uncultured cyanobacterium  
 179 OTU\_1630:k:Bacteria,p:Verrucomicrobiota,c:Lentisphaeria,o:Victivallales,f:Victivallaceae

180 OTU\_1911:k:Bacteria,p:Firmicutes,c:Clostridia,o:Oscillospirales,f:Ruminococcaceae,g:Incertae Sedis,s:Uncultured bacterium  
 181 OTU\_3714:k:Bacteria,p:Firmicutes,c:Bacilli,o:Lactobacillales,f:Streptococcaceae,g:Lactococcus  
 182 OTU\_2121:k:Bacteria,p:Firmicutes,c:Clostridia,o:Clostridia vadinBB60 group  
 183 OTU\_4233:k:Bacteria,p:Firmicutes,c:Clostridia,o:Lachnospirales,f:Lachnospiraceae  
 184 OTU\_2507:k:Bacteria,p:Proteobacteria,c:Alphaproteobacteria,o:Rhizobiales,f:Xanthobacteraceae  
 185 OTU\_4176:k:Bacteria,p:Bacteroidota,c:Bacteroidia,o:Bacteroidales,f:Bacteroidaceae,g:Bacteroides  
 186 OTU\_3579:k:Bacteria,p:Firmicutes,c:Clostridia,o:Lachnospirales,f:Lachnospiraceae,g:Eisenbergiella,s:uncultured  
 187 OTU\_3580:k:Bacteria,p:Firmicutes,c:Clostridia,o:Lachnospirales,f:Lachnospiraceae,g:Blautia,s:uncultured  
 188 OTU\_1751:k:Bacteria,p:Bacteroidota,c:Bacteroidia,o:Bacteroidales,f:Bacteroidaceae,g:Bacteroides  
 189 OTU\_3881:k:Bacteria,p:Proteobacteria,c:Alphaproteobacteria,o:Sphingomonadales,f:Sphingomonadaceae  
 190 OTU\_4157:k:Bacteria,p:Firmicutes,c:Clostridia,o:Lachnospirales,f:Lachnospiraceae  
 191 OTU\_2743:k:Bacteria,p:Firmicutes,c:Clostridia,o:Peptostreptococcales-Tissierellales  
 192 OTU\_2303:k:Bacteria,p:Firmicutes,c:Bacilli,o:Lactobacillales,f:Lactobacillaceae,g:Lactobacillus,s:uncultured bacterium  
 193 OTU\_3676:k:Bacteria,p:Actinobacteriota,c:Actinobacteria,o:Propionibacteriales,f:Nocardiodaceae,g:Nocardioideis,s:uncultured  
 194 OTU\_3675:k:Bacteria,p:Chloroflexi,c:Chloroflexia,o:Thermomicrobiales,f:JG30-KF-CM45  
 195 OTU\_2289:k:Bacteria,p:Firmicutes,c:Bacilli,o:Erysipelotrichales,f:Erysipelotrichaceae,g:uncultured,s:uncultured bacterium  
 196 OTU\_3193:k:Bacteria,p:Firmicutes,c:Clostridia,o:Christensenellales,f:Christensenellaceae,g:Christensenellaceae-R-7-group  
 197 OTU\_3806:k:Bacteria,p:Firmicutes,c:Clostridia,o:Oscillospirales,f:Oscillospiraceae  
 198 OTU\_3702:k:Bacteria,p:Firmicutes,c:Clostridia,o:Oscillospirales,f:Ruminococcaceae,g:uncultured,s:uncultured bacterium  
 199 OTU\_2078:k:Bacteria,p:Firmicutes,c:Bacilli,o:Lactobacillales,f:Leuconostocaceae,g:Weissella,s:Weissella minor  
 200 OTU\_2964:k:Bacteria,p:Firmicutes,c:Bacilli,o:Paenibacillales,f:Paenibacillaceae,g:Paenibacillus,s:Uncultured bacterium  
 201 OTU\_3439:k:Bacteria,p:Proteobacteria,c:Gammaproteobacteria,o:Run-SP154  
 202 OTU\_4198:k:Bacteria,p:Firmicutes  
 203 OTU\_4295:k:Bacteria,p:Proteobacteria,c:Gammaproteobacteria,o:Burkholderiales,f:Burkholderiaceae,g:uncultured  
 204 OTU\_2513:k:Bacteria,p:Firmicutes,c:Clostridia,o:Peptostreptococcales-Tissierellales,f:Anaerovoracaceae,g:Eubacterium,s:Eubacterium pyruvativorans  
 205 OTU\_3428:k:Bacteria,p:Firmicutes,c:Clostridia,o:Peptostreptococcales-Tissierellales,g:Tepidimicrobium,s:uncultured bacterium  
 206 OTU\_1403:k:Bacteria,p:Firmicutes,c:Bacilli,o:RF39  
 207 OTU\_1810:k:Bacteria,p:Chloroflexi,c:Anaerolineae,o:SBR1031  
 208 OTU\_2510:k:Bacteria,p:Firmicutes,c:Clostridia,o:Oscillospirales,f:Oscillospiraceae,g:Intestinimonas,s:Intestinimonas timonensis  
 209 OTU\_2972:k:Bacteria,p:Firmicutes,c:Clostridia,o:Oscillospirales,f:Oscillospiraceae,g:uncultured,s:uncultured bacterium  
 210 OTU\_3798:k:Bacteria,p:Firmicutes

|     |                                                                                                                             |
|-----|-----------------------------------------------------------------------------------------------------------------------------|
| 211 | OTU_3801:k:Bacteria,p:Firmicutes,c:Clostridia,o:Lachnospirales,f:Lachnospiraceae,g:Tyzzerella                               |
| 212 | OTU_3827:k:Bacteria,p:Firmicutes,c:Bacilli,o:Lactobacillales,f:Lactobacillaceae,g:Lactobacillus,s:Uncultured                |
| 213 | OTU_3497:k:Bacteria,p:Firmicutes,c:Bacilli,o:Lactobacillales,f:Lactobacillaceae,g:Lactobacillus,s:Ligilactobacillus murinus |
| 214 | OTU_3076:k:Bacteria,p:Firmicutes,c:Clostridia,o:Lachnospirales,f:Lachnospiraceae                                            |
| 215 | OTU_4055:k:Bacteria,p:Acidobacteriota,c:Blastocatellia,o:11-24                                                              |
| 216 | OTU_3049:k:Bacteria,p:Deinococcota,c:Deinococci,o:Deinococcales,f:Deinococcaceae,g:Deinococcus                              |

**Supplementary Table S9. Unique 48 OTUs in gut samples, contributing to variance in the overall sequences.**

| No. | OTUs descriptions                                                                                                                     |
|-----|---------------------------------------------------------------------------------------------------------------------------------------|
| 1   | OTU_2233:k:Bacteria,p:Proteobacteria,c:Gammaproteobacteria,o:Orbales,f:Orbaceae,g:Frischella,s:Frischella perrara                     |
| 2   | OTU_3865:k:Bacteria,p:Campilobacterota,c:Campylobacterota,o:Campylobacterales,f:Helicobacteraceae,g:Helicobacter,s:Uncultured         |
| 3   | OTU_2360:k:Bacteria,p:Proteobacteria,c:Alphaproteobacteria,o:Acetobacteriales,f:Acetobacteraceae,g:Bombella                           |
| 4   | OTU_220:k:Bacteria,p:Proteobacteria,c:Gammaproteobacteria,o:Burkholderiales,f:Burkholderiaceae,g:Cupriavidus                          |
| 5   | OTU_2185:k:Bacteria,p:Firmicutes,c:Bacilli,o:Lactobacillales,f:Lactobacillaceae,g:Lactobacillus,s:Lactobacillus apis                  |
| 6   | OTU_3038:k:Bacteria,p:Firmicutes                                                                                                      |
| 7   | OTU_4118:k:Bacteria,p:Firmicutes,c:Bacilli,o:Lactobacillales,f:Lactobacillaceae,g:Lactobacillus,s:Apilactobacillus kunkeei            |
| 8   | OTU_1549:k:Bacteria,p:Proteobacteria,c:Gammaproteobacteria,o:Orbales,f:Orbaceae,g:Gilliamella,s:gamma proteobacterium                 |
| 9   | OTU_3977:k:Bacteria,p:Firmicutes,c:Bacilli                                                                                            |
| 10  | OTU_2954:k:Bacteria,p:Proteobacteria,c:Gammaproteobacteria,o:Burkholderiales                                                          |
| 11  | OTU_770:k:Bacteria,p:Proteobacteria,c:Gammaproteobacteria,o:Burkholderiales,f:Oxalobacteraceae,g:Herbaspirillum                       |
| 12  | OTU_4193:k:Bacteria,p:Patescibacteria,c:Saccharimonadia,o:Saccharimonadales,f:Saccharimonadaceae,g:TM7a,s:uncultured                  |
| 13  | OTU_3586:k:Bacteria,p:Firmicutes,c:Bacilli,o:RF39                                                                                     |
| 14  | OTU_4025:k:Bacteria,p:Proteobacteria,c:Gammaproteobacteria,o:Burkholderiales,f:Neisseriaceae,g:Snodgrassella,s:Snodgrassella alvi     |
| 15  | OTU_4059:k:Bacteria,p:Firmicutes,c:Clostridia,o:Oscillospirales,f:Ruminococcaceae,g:Faecalibacterium,s:uncultured                     |
| 16  | OTU_2624:k:Bacteria                                                                                                                   |
| 17  | OTU_4351:k:Bacteria,p:Firmicutes,c:Clostridia,o:Oscillospirales,f:[Eubacterium]-coprostanoligenes group                               |
| 18  | OTU_3186:k:Bacteria                                                                                                                   |
| 19  | OTU_2480:k:Bacteria                                                                                                                   |
| 20  | OTU_4194:k:Bacteria,p:Firmicutes,c:Bacilli,o:Erysipelotrichales,f:Erysipelotrichaceae,g:Turicibacter,s:Uncultured bacterium           |
| 21  | OTU_4327:k:Bacteria                                                                                                                   |
| 22  | OTU_4241:k:Bacteria,p:Firmicutes,c:Clostridia,o:Peptostreptococcales-Tissierellales,f:Peptostreptococcaceae,g:Romboutsia,s:uncultured |
| 23  | OTU_4319:k:Bacteria,p:Actinobacteriota,c:Actinobacteria,o:Actinomycetales,f:Actinomycetaceae,g:Actinomyces                            |
| 24  | OTU_3807:k:Bacteria,p:Proteobacteria,c:Gammaproteobacteria,o:Burkholderiales                                                          |
| 25  | OTU_1519:k:Bacteria,p:Bacteroidota,c:Bacteroidia,o:Chitinophagales,f:Chitinophagaceae                                                 |

|    |                                                                                                                                           |
|----|-------------------------------------------------------------------------------------------------------------------------------------------|
| 26 | OTU_3793:k:Bacteria,p:Bacteroidota,c:Bacteroidia,o:Flavobacteriales,f:Weeksellaceae,g:Apibacter,s:uncultured Bacteroidetes                |
| 27 | OTU_3701:k:Bacteria,p:Proteobacteria,c:Gammaproteobacteria,o:Burkholderiales,f:Burkholderiaceae,g:Ralstonia,s:Ralstonia solanacearum      |
| 28 | OTU_2805:k:Bacteria,p:Firmicutes,c:Bacilli,o:Erysipelotrichales,f:Erysipelotrichaceae,g:Ileibacterium,s:Ileibacterium valens              |
| 29 | OTU_1972:k:Bacteria,p:Verrucomicrobiota,c:Verrucomicrobiae,o:Verrucomicrobiales,f:Akkermansiaceae,g:Akkermansia,s:uncultured              |
| 30 | OTU_1773:k:Bacteria,p:Chloroflexi,c:Anaerolineae,o:Caldilineales,f:Caldilineaceae,g:uncultured,s:uncultured bacterium                     |
| 31 | OTU_1206:k:Bacteria,p:Firmicutes,c:Clostridia,o:Clostridia_vadinBB60_group                                                                |
| 32 | OTU_3734:k:Bacteria,p:Firmicutes,c:Bacilli,o:Lactobacillales,f:Lactobacillaceae,g:Lactobacillus,s:Lactobacillus mucosae                   |
| 33 | OTU_1942:k:Bacteria,p:Bacteroidota,c:Bacteroidia,o:Chitinophagales,f:Chitinophagaceae                                                     |
| 34 | OTU_1353:k:Bacteria,p:Patescibacteria,c:Saccharimonadia,o:Saccharimonadales                                                               |
| 35 | OTU_4288:k:Bacteria,p:Firmicutes,c:Clostridia,o:Lachnospirales,f:Lachnospiraceae,g:Blautia,s:uncultured bacterium                         |
| 36 | OTU_4371:k:Bacteria,p:Firmicutes,c:Clostridia,o:Lachnospirales,f:Lachnospiraceae,g:Dorea,s:uncultured bacterium                           |
| 37 | OTU_2850:k:Bacteria,p:Proteobacteria,c:Alphaproteobacteria,o:Rhodobacterales,f:Rhodobacteraceae,g:Defluviimonas                           |
| 38 | OTU_3660:k:Bacteria,p:Firmicutes,c:Bacilli,o:Erysipelotrichales,f:Erysipelotrichaceae,g:Allobaculum                                       |
| 39 | OTU_3643:k:Bacteria                                                                                                                       |
| 40 | OTU_3017:k:Bacteria,p:Firmicutes                                                                                                          |
| 41 | OTU_3263:k:Bacteria                                                                                                                       |
| 42 | OTU_3704:k:Bacteria,p:Firmicutes,c:Bacilli,o:Erysipelotrichales,f:Erysipelotrichaceae,g:Holdemanella,s:uncultured                         |
| 43 | OTU_2962:k:Bacteria,p:Firmicutes,c:Bacilli                                                                                                |
| 44 | OTU_4031:k:Bacteria                                                                                                                       |
| 45 | OTU_3761:k:Bacteria,p:Firmicutes,c:Clostridia                                                                                             |
| 46 | OTU_3386:k:Bacteria,p:Campilobacterota,c:Campylobacteria,o:Campylobacteriales,f:Helicobacteraceae,g:Helicobacter,s:Helicobacter muridarum |
| 47 | OTU_2188:k:Bacteria,p:Acidobacteriota,c:Acidobacteriae,o:Bryobacteriales,f:Bryobacteraceae,g:Bryobacter,s:uncultured                      |
| 48 | OTU_4513:k:Bacteria,p:Proteobacteria,c:Alphaproteobacteria,o:Sphingomonadales,f:Sphingomonadaceae,g:Sphingobium                           |

**Supplementary Table S10. Shared OTUs among lung, stomach and gut groups**

| No. | Shared OUT descriptions                                                                                                                      |
|-----|----------------------------------------------------------------------------------------------------------------------------------------------|
| 1   | OTU_23:k:Bacteria,p:Proteobacteria,c:Gammaproteobacteria,o:Pasteurellales,f:Pasteurellaceae,g:Rodentibacter,s:Pasteurellaceae bacterium      |
| 2   | OTU_14:k:Bacteria,p:Bacteroidota,c:Bacteroidia,o:Bacteroidales,f:Porphyromonadaceae,g:Porphyromonas,s:Uncultured bacterium                   |
| 3   | OTU_80:k:Bacteria,p:Firmicutes,c:Negativicutes,o:Veillonellales-Selenomonadales,f:Veillonellaceae,g:Veillonella,s:Uncultured Veillonellaceae |
| 4   | OTU_26:k:Bacteria,p:Actinobacteriota,c:Actinobacteria,o:Actinomycetales,f:Actinomycetaceae,g:Actinomyces                                     |
| 5   | OTU_20:k:Bacteria,p:Actinobacteriota,c:Actinobacteria,o:Micrococcales,f:Micrococcaceae,g:Rothia,s:Uncultured                                 |
| 6   | OTU_78:k:Bacteria,p:Fusobacteriota,c:Fusobacteriia,o:Fusobacteriales,f:Fusobacteriaceae,g:Fusobacterium                                      |

7 OTU\_35:k:Bacteria,p:Proteobacteria,c:Gammaproteobacteria,o:Burkholderiales,f:Alcaligenaceae  
 8 OTU\_114:k:Bacteria,p:Firmicutes,c:Bacilli,o:Lactobacillales,f:Streptococcaceae,g:Streptococcus,s:Uncultured bacterium  
 9 OTU\_1859:k:Bacteria,p:Proteobacteria,c:Gammaproteobacteria,o:Pasteurellales,f:Pasteurellaceae,g:Rodentibacter,s:Pasteurellaceae bacterium  
 10 OTU\_100:k:Bacteria,p:Proteobacteria,c:Gammaproteobacteria,o:Pasteurellales,f:Pasteurellaceae,g:Rodentibacter,s:Pasteurellaceae bacterium  
 11 OTU\_116:k:Bacteria,p:Proteobacteria,c:Alphaproteobacteria,o:Rhizobiales,f:Xanthobacteraceae,g:Bradyrhizobium  
 12 OTU\_76:k:Bacteria,p:Firmicutes,c:Bacilli,o:Lactobacillales,f:Streptococcaceae,g:Streptococcus,s:Streptococcus azizii  
 13 OTU\_65:k:Bacteria,p:Bacteroidota,c:Bacteroidia,o:Bacteroidales,f:Bacteroidaceae,g:Bacteroides  
 14 OTU\_12:k:Bacteria,p:Proteobacteria,c:Gammaproteobacteria,o:Enterobacteriales,f:Enterobacteriaceae,g:Escherichia-Shigella, s:E. coli  
 15 OTU\_215:k:Bacteria,p:Firmicutes,c:Clostridia,o:Lachnospirales,f:Lachnospiraceae  
 16 OTU\_206:k:Bacteria,p:Actinobacteriota,c:Actinobacteria,o:Corynebacteriales,f:Corynebacteriaceae,g:Corynebacterium,s:Corynebacterium  
 pseudotuberculosis  
 17 OTU\_106:k:Bacteria,p:Proteobacteria,c:Gammaproteobacteria,o:Burkholderiales,f:Burkholderiaceae,g:Ralstonia,s:Ralstonia mannitolilytica  
 18 OTU\_289:k:Bacteria,p:Firmicutes,c:Bacilli,o:Lactobacillales  
 19 OTU\_477:k:Bacteria,p:Actinobacteriota,c:Actinobacteria  
 20 OTU\_10:k:Bacteria,p:Firmicutes,c:Bacilli,o:Lactobacillales,f:Lactobacillaceae,g:Lactobacillus,s:Lactobacillus murinus  
 21 OTU\_237:k:Bacteria,p:Firmicutes,c:Clostridia,o:Peptostreptococcales-Tissierellales,f:Peptostreptococcaceae,g:Peptostreptococcus,s:Peptostreptococcus sp  
 22 OTU\_754:k:Bacteria,p:Firmicutes,c:Bacilli,o:Erysipelotrichales,f:Erysipelotrichaceae,g:Dielma,s:uncultured bacterium  
 23 OTU\_72:k:Bacteria,p:Firmicutes,c:Bacilli,o:Lactobacillales,f:Aerococcaceae  
 24 OTU\_141:k:Bacteria,p:Actinobacteriota,c:Actinobacteria,o:Corynebacteriales,f:Corynebacteriaceae,g:Corynebacterium,s:Corynebacterium zhongnanshanii  
 25 OTU\_44:k:Bacteria,p:Firmicutes,c:Bacilli,o:Staphylococcales,f:Staphylococcaceae,g:Staphylococcus,s:Staphylococcus fleurettii  
 26 OTU\_2913:k:Bacteria,p:Proteobacteria,c:Gammaproteobacteria,o:Pasteurellales,f:Pasteurellaceae,g:Rodentibacter,s:Pasteurellaceae bacterium  
 27 OTU\_3053:k:Bacteria,p:Proteobacteria,c:Gammaproteobacteria,o:Pseudomonadales,f:Moraxellaceae,g:Acinetobacter,s:Acinetobacter lwoffii  
 28 OTU\_315:k:Bacteria,p:Firmicutes,c:Clostridia,o:Lachnospirales,f:Lachnospiraceae,g:[Eubacterium]-fissicatena group  
 29 OTU\_39:k:Bacteria,p:Firmicutes,c:Bacilli,o:Staphylococcales,f:Gemellaceae,g:Gemella,s:uncultured bacterium  
 30 OTU\_558:k:Bacteria,p:Proteobacteria,c:Gammaproteobacteria,o:Xanthomonadales,f:Xanthomonadaceae,g:Stenotrophomonas,s:Stenotrophomonas  
 maltophilia  
 31 OTU\_97:k:Bacteria,p:Firmicutes,c:Bacilli,o:Lactobacillales,f:Enterococcaceae,g:Enterococcus,s:Enterococcus faecium  
 32 OTU\_241:k:Bacteria,p:Firmicutes,c:Bacilli,o:Lactobacillales  
 33 OTU\_645:k:Bacteria,p:Actinobacteriota,c:Actinobacteria,o:Actinomycetales,f:Actinomycetaceae,g:Actinomyces,s:Uncultured  
 34 OTU\_15:k:Bacteria,p:Firmicutes,c:Bacilli,o:Staphylococcales,f:Staphylococcaceae,g:Macrococcus,s:Macrococcus goetzii  
 35 OTU\_124:k:Bacteria,p:Bacteroidota,c:Bacteroidia,o:Bacteroidales,f:Muribaculaceae  
 36 OTU\_92:k:Bacteria,p:Firmicutes,c:Bacilli,o:Lactobacillales,f:Streptococcaceae,g:Lactococcus,s:Lactococcus cremoris

37 OTU\_380:k:Bacteria,p:Fusobacteriota,c:Fusobacteriia,o:Fusobacteriales,f:Fusobacteriaceae,g:Fusobacterium  
 38 OTU\_3:k:Bacteria,p:Proteobacteria,c:Gammaproteobacteria,o:Burkholderiales,f:Alcaligenaceae,g:Bordetella,s:Bordetella hinzii  
 39 OTU\_516:k:Bacteria,p:Patescibacteria,c:Saccharimonadia,o:Saccharimonadales  
 40 OTU\_91:k:Bacteria,p:Proteobacteria,c:Alphaproteobacteria,o:Sphingomonadales,f:Sphingomonadaceae,g:Sphingomonas,s:Sphingomonas kyeonggiensis  
 41 OTU\_13:k:Bacteria,p:Firmicutes,c:Bacilli,o:Lactobacillales,f:Streptococcaceae,g:Streptococcus,s:Streptococcus macedonicus  
 42 OTU\_614:k:Bacteria,p:Firmicutes,c:Bacilli,o:Mycoplasmatales,f:Mycoplasmataceae,g:Mycoplasma,s:uncultured  
 43 OTU\_41:k:Bacteria,p:Proteobacteria,c:Gammaproteobacteria,o:Pseudomonadales,f:Moraxellaceae,g:Acinetobacter  
 44 OTU\_56:k:Bacteria,p:Proteobacteria,c:Gammaproteobacteria,o:Pasteurellales,f:Pasteurellaceae  
 45 OTU\_1209:k:Bacteria,p:Proteobacteria,c:Alphaproteobacteria,o:Rhizobiales,f:Rhizobiaceae,g:Bartonella,s:Uncultured  
 46 OTU\_556:k:Bacteria,p:Firmicutes,c:Clostridia,o:Lachnospirales,f:Lachnospiraceae  
 47 OTU\_133:k:Bacteria,p:Actinobacteriota,c:Actinobacteria,o:Micrococcales,f:Dermabacteraceae,g:Brachybacterium,s:Uncultured  
 48 OTU\_1011:k:Bacteria,p:Firmicutes,c:Bacilli,o:Bacillales,f:Bacillaceae,g:Bacillus,s:Bacillus altitudinis  
 49 OTU\_801:k:Bacteria,p:Firmicutes,c:Bacilli,o:Lactobacillales,f:Vagococcaceae,g:Vagococcus,s:Vagococcus fluvialis  
 50 OTU\_258:k:Bacteria,p:Proteobacteria,c:Gammaproteobacteria,o:Pseudomonadales,f:Pseudomonadaceae,g:Pseudomonas,s:Pseudomonas mendocina  
 51 OTU\_502:k:Bacteria,p:Bacteroidota,c:Bacteroidia,o:Bacteroidales,f:Bacteroidaceae,g:Bacteroides,s:Bacteroides thetaiotaomicron  
 52 OTU\_1029:k:Bacteria,p:Firmicutes,c:Bacilli,o:Erysipelotrichales,f:Erysipelotrichaceae  
 53 OTU\_112:k:Bacteria,p:Actinobacteriota,c:Actinobacteria,o:Micrococcales,f:Intrasporangiaceae,g:Janibacter,s:Janibacter melonis  
 54 OTU\_805:k:Bacteria,p:Proteobacteria,c:Alphaproteobacteria,o:Rhodobacterales,f:Rhodobacteraceae,g:Gemmobacter  
 55 OTU\_21:k:Bacteria,p:Fusobacteriota,c:Fusobacteriia,o:Fusobacteriales,f:Fusobacteriaceae,g:Fusobacterium  
 56 OTU\_2324:k:Bacteria,p:Firmicutes,c:Bacilli,o:Bacillales,f:Bacillaceae,g:Bacillus,s:Peribacillus frigoritolerans  
 57 OTU\_243:k:Bacteria,p:Proteobacteria,c:Gammaproteobacteria,o:Pseudomonadales,f:Moraxellaceae,g:Enhydrobacter  
 58 OTU\_1:k:Bacteria,p:Firmicutes,c:Bacilli,o:Lactobacillales,f:Lactobacillaceae,g:Lactobacillus,s:Lactobacillus johnsonii  
 59 OTU\_22:k:Bacteria,p:Bacteroidota,c:Bacteroidia,o:Bacteroidales,f:Prevotellaceae,g:Prevotella,s:Uncultured Prevotella  
 60 OTU\_98:k:Bacteria,p:Firmicutes,c:Clostridia,o:Oscillospirales,f:Ruminococcaceae,g:Subdoligranulum  
 61 OTU\_3520:k:Bacteria,p:Bacteroidota,c:Bacteroidia,o:Cytophagales,f:Microscillaceae,g:uncultured,s:uncultured bacterium  
 62 OTU\_28:k:Bacteria,p:Firmicutes,c:Clostridia,o:Lachnospirales,f:Lachnospiraceae,g:Tyzzerella,s:uncultured bacterium  
 63 OTU\_58:k:Bacteria,p:Firmicutes,c:Clostridia,o:Lachnospirales,f:Lachnospiraceae,g:[Ruminococcus]-gauvreauii group  
 64 OTU\_54:k:Bacteria,p:Proteobacteria,c:Gammaproteobacteria,o:Enterobacterales,f:Enterobacteriaceae,g:Enterobacter,s:Enterobacter roggkampii  
 65 OTU\_1149:k:Bacteria,p:Firmicutes,c:Bacilli,o:Lactobacillales,f:Lactobacillaceae,g:Lactobacillus,s:Lactobacillus acidophilus  
 66 OTU\_334:k:Bacteria,p:Firmicutes,c:Bacilli,o:Erysipelotrichales,f:Erysipelatoclostridiaceae,g:Coprobaillus,s:Coprobaillus cateniformis  
 67 OTU\_373:k:Bacteria,p:Firmicutes,c:Clostridia,o:Oscillospirales,f:Oscillospiraceae,g:NK4A214 group

68 OTU\_33:k:Bacteria,p:Firmicutes,c:Clostridia,o:Lachnospirales,f:Lachnospiraceae,g:[Ruminococcus]-gnavus group  
 69 OTU\_4:k:Bacteria,p:Firmicutes,c:Bacilli,o:Lactobacillales,f:Lactobacillaceae,g:Lactobacillus,s:Limosilactobacillus reuteri  
 70 OTU\_9:k:Bacteria,p:Campilobacterota,c:Campylobacteria,o:Campylobacterales,f:Helicobacteraceae,g:Helicobacter,s:Helicobacter apodemus  
 71 OTU\_16:k:Bacteria,p:Actinobacteriota,c:Coriobacteriia,o:Coriobacteriales,f:Atopobiaceae,g:Olsenella,s:uncultured  
 72 OTU\_7:k:Bacteria,p:Actinobacteriota,c:Actinobacteria,o:Bifidobacteriales,f:Bifidobacteriaceae,g:Bifidobacterium,s:Bifidobacterium faecale  
 73 OTU\_60:k:Bacteria,p:Firmicutes,c:Bacilli,o:Erysipelotrichales,f:Erysipelotrichaceae,g:Allobaculum,s:uncultured bacterium  
 74 OTU\_17:k:Bacteria,p:Firmicutes,c:Bacilli,o:Lactobacillales,f:Lactobacillaceae,g:Lactobacillus,s:Limosilactobacillus mucosae  
 75 OTU\_40:k:Bacteria,p:Actinobacteriota,c:Actinobacteria,o:Bifidobacteriales,f:Bifidobacteriaceae,g:Bifidobacterium,s:Bifidobacterium longum  
 76 OTU\_61:k:Bacteria,p:Firmicutes,c:Negativicutes,o:Veillonellales-Selenomonadales,f:Veillonellaceae,g:Megasphaera  
 77 OTU\_24:k:Bacteria,p:Deferribacterota,c:Deferribacteres,o:Deferribacterales,f:Deferribacteraceae,g:Mucispirillum  
 78 OTU\_47:k:Bacteria,p:Firmicutes,c:Bacilli,o:Lactobacillales,f:Lactobacillaceae,g:Lactobacillus,s:Lactobacillus ruminis  
 79 OTU\_18:k:Bacteria,p:Actinobacteriota,c:Actinobacteria,o:Bifidobacteriales,f:Bifidobacteriaceae,g:Bifidobacterium,s:Bifidobacterium pseudolongum  
 80 OTU\_506:k:Bacteria,p:Firmicutes,c:Negativicutes,o:Veillonellales-Selenomonadales,f:Veillonellaceae,g:Dialister,s:Dialister succinatiphilus  
 81 OTU\_34:k:Bacteria,p:Firmicutes,c:Bacilli,o:Erysipelotrichales,f:Erysipelotrichaceae,g:Allobaculum,s:Uncultured bacterium  
 82 OTU\_616:k:Bacteria,p:Firmicutes,c:Bacilli,o:Lactobacillales,f:Lactobacillaceae,g:Lactobacillus,s:Lactobacillus jensenii  
 83 OTU\_31:k:Bacteria,p:Firmicutes,c:Clostridia,o:Peptostreptococcales-Tissierellales,f:Peptostreptococcaceae,g:Romboutsia  
 84 OTU\_45:k:Bacteria,p:Proteobacteria,c:Gammaproteobacteria,o:Burkholderiales,f:Sutterellaceae,g:Parasutterella  
 85 OTU\_135:k:Bacteria,p:Proteobacteria,c:Gammaproteobacteria,o:Aeromonadales,f:Succinivibrionaceae,g:Anaerobiospirillum  
 86 OTU\_48:k:Bacteria,p:Spirochaetota,c:Spirochaetia,o:Spirochaetales,f:Spirochaetaceae,g:Treponema,s:Uncultured  
 87 OTU\_8:k:Bacteria,p:Campilobacterota,c:Campylobacteria,o:Campylobacterales,f:Helicobacteraceae,g:Helicobacter,s:Helicobacter muridarum  
 88 OTU\_46:k:Bacteria,p:Bacteroidota,c:Bacteroidia,o:Bacteroidales,f:Prevotellaceae,g:Alloprevotella,s:uncultured bacterium  
 89 OTU\_6:k:Bacteria,p:Firmicutes,c:Bacilli,o:Erysipelotrichales,f:Erysipelotrichaceae,g:Turicibacter,s:Turicibacter LA61  
 90 OTU\_2466:k:Bacteria,p:Firmicutes,c:Bacilli,o:Erysipelotrichales,f:Erysipelatoclostridiaceae,g:Catenibacterium  
 91 OTU\_52:k:Bacteria,p:Actinobacteriota,c:Coriobacteriia,o:Coriobacteriales,f:Coriobacteriaceae,g:Collinsella,s:uncultured\_bacterium  
 92 OTU\_2617:k:Bacteria,p:Firmicutes,c:Clostridia,o:Lachnospirales,f:Lachnospiraceae  
 93 OTU\_119:k:Bacteria,p:Actinobacteriota,c:Coriobacteriia,o:Coriobacteriales,f:Atopobiaceae  
 94 OTU\_5:k:Bacteria,p:Firmicutes,c:Bacilli,o:Lactobacillales,f:Lactobacillaceae,g:Lactobacillus,s:Lactobacillus intestinalis  
 95 OTU\_2552:k:Bacteria,p:Firmicutes,c:Clostridia,o:Lachnospirales,f:Lachnospiraceae  
 96 OTU\_121:k:Bacteria,p:Firmicutes,c:Negativicutes,o:Acidaminococcales,f:Acidaminococcaceae,g:Phascolarctobacterium,s:uncultured  
 97 OTU\_64:k:Bacteria,p:Firmicutes,c:Clostridia,o:Clostridiales,f:Clostridiaceae,g:Clostridium-sensu-stricto-1,s:Clostridium perfringens  
 98 OTU\_73:k:Bacteria,p:Bacteroidota,c:Bacteroidia,o:Bacteroidales,f:Bacteroidaceae,g:Bacteroides



99 OTU\_79:k:Bacteria,p:Actinobacteriota,c:Actinobacteria,o:Micrococcales,f:Micrococcaceae,g:Glutamicibacter  
 100 OTU\_676:k:Bacteria,p:Campilobacterota,c:Campylobacteria,o:Campylobacterales,f:Helicobacteraceae,g:Helicobacter,s:Helicobacter japonicus  
 101 OTU\_150:k:Bacteria,p:Firmicutes,c:Bacilli,o:Erysipelotrichales,f:Erysipelotrichaceae,g:uncultured,s:uncultured bacterium  
 102 OTU\_623:k:Bacteria,p:Actinobacteriota,c:Actinobacteria,o:Micrococcales,f:Micrococcaceae,g:Kocuria,s:Kocuria palustris  
 103 OTU\_77:k:Bacteria,p:Firmicutes,c:Bacilli,o:Erysipelotrichales,f:Erysipelotrichaceae,g:uncultured,s:uncultured bacterium  
 104 OTU\_30:k:Bacteria,p:Firmicutes,c:Clostridia,o:Clostridiales,f:Clostridiaceae,g:Clostridium-sensu-stricto-1,s:Clostridium disporicum  
 105 OTU\_313:k:Bacteria,p:Firmicutes,c:Bacilli,o:Erysipelotrichales,f:Erysipelotrichaceae,g:Turicibacter,s:Turicibacter sanguinis  
 106 OTU\_283:k:Bacteria,p:Spirochaetota,c:Brachyspirae,o:Brachyspirales,f:Brachyspiraceae,g:Brachyspira  
 107 OTU\_168:k:Bacteria,p:Desulfobacterota,c:Desulfovibrionia,o:Desulfovibrionales,f:Desulfovibrionaceae,g:uncultured  
 108 OTU\_75:k:Bacteria,p:Bacteroidota,c:Bacteroidia,o:Bacteroidales,f:Muribaculaceae  
 109 OTU\_2897:k:Bacteria,p:Bacteroidota,c:Bacteroidia,o:Bacteroidales,f:Prevotellaceae,g:Prevotella,s:uncultured  
 110 OTU\_36:k:Bacteria,p:Firmicutes,c:Clostridia,o:Lachnospirales,f:Lachnospiraceae,g:Blautia,s:uncultured bacterium  
 111 OTU\_37:k:Bacteria,p:Campilobacterota,c:Campylobacteria,o:Campylobacterales,f:Helicobacteraceae,g:Helicobacter,s:Helicobacter cholecystus  
 112 OTU\_42:k:Bacteria,p:Firmicutes,c:Bacilli,o:Lactobacillales,f:Streptococcaceae,g:Streptococcus,s:Streptococcus hyointestinalis  
 113 OTU\_104:k:Bacteria,p:Desulfobacterota,c:Desulfovibrionia,o:Desulfovibrionales,f:Desulfovibrionaceae,g:Desulfovibrio,s:uncultured  
 114 OTU\_86:k:Bacteria,p:Firmicutes,c:Clostridia,o:Lachnospirales,f:Lachnospiraceae,g:Roseburia,s:Uncultured bacterium  
 115 OTU\_695:k:Bacteria,p:Firmicutes,c:Clostridia,o:Peptostreptococcales-Tissierellales,f:Anaerovoracaceae,g:Family-XIII-AD3011 group,s:uncultured  
 116 OTU\_222:k:Bacteria,p:Proteobacteria,c:Gammaproteobacteria,o:Aeromonadales,f:Succinivibrionaceae,g:Succinivibrio,s:uncultured  
 117 OTU\_518:k:Bacteria,p:Firmicutes,c:Clostridia,o:Clostridiales,f:Clostridiaceae,g:Sarcina  
 118 OTU\_2083:k:Bacteria,p:Firmicutes,c:Clostridia,o:Lachnospirales,f:Lachnospiraceae,g:Blautia,s:Uncultured bacterium  
 119 OTU\_254:k:Bacteria,p:Actinobacteriota,c:Coriobacteriia,o:Coriobacteriales,f:Coriobacteriaceae,g:Collinsella,s:Collinsella BA40  
 120 OTU\_29:k:Bacteria,p:Firmicutes,c:Clostridia,o:Lachnospirales,f:Lachnospiraceae,g:Blautia,s:Blautia pseudococcoides  
 121 OTU\_772:k:Bacteria,p:Actinobacteriota,c:Actinobacteria,o:Corynebacteriales,f:Corynebacteriaceae,g:Corynebacterium,s:Uncultured Corynebacterium  
 122 OTU\_126:k:Bacteria,p:Bacteroidota,c:Bacteroidia,o:Bacteroidales,f:Muribaculaceae  
 123 OTU\_162:k:Bacteria,p:Firmicutes,c:Clostridia,o:Oscillospirales,f:Ruminococcaceae,g:Faecalibacterium,s:uncultured bacterium  
 124 OTU\_196:k:Bacteria,p:Firmicutes,c:Negativicutes,o:Veillonellales-Selenomonadales,f:Veillonellaceae,g:Megasphaera  
 125 OTU\_90:k:Bacteria,p:Bacteroidota,c:Bacteroidia,o:Bacteroidales,f:Bacteroidaceae,g:Bacteroides,s:uncultured bacterium  
 126 OTU\_143:k:Bacteria,p:Firmicutes,c:Clostridia,o:Lachnospirales,f:Lachnospiraceae,g:Marvinbryantia,s:uncultured bacterium  
 127 OTU\_50:k:Bacteria,p:Proteobacteria,c:Gammaproteobacteria,o:Pasteurellales,f:Pasteurellaceae,g:Actinobacillus  
 128 OTU\_253:k:Bacteria,p:Bacteroidota,c:Bacteroidia,o:Bacteroidales,f:Tannerellaceae,g:Parabacteroides  
 129 OTU\_365:k:Bacteria,p:Firmicutes,c:Negativicutes,o:Veillonellales-Selenomonadales,f:Selenomonadaceae,g:Mitsuokella

130 OTU\_740:k:Bacteria,p:Firmicutes,c:Clostridia,o:Oscillospirales,f:Oscillospiraceae,g:uncultured  
 131 OTU\_88:k:Bacteria,p:Firmicutes,c:Bacilli,o:Erysipelotrichales,f:Erysipelotrichaceae,g:Allobaculum  
 132 OTU\_179:k:Bacteria,p:Proteobacteria,c:Gammaproteobacteria,o:Burkholderiales,f:Sutterellaceae,g:Sutterella  
 133 OTU\_3478:k:Bacteria,p:Firmicutes,c:Clostridia,o:Lachnospirales,f:Lachnospiraceae,g:Blautia,s:uncultured bacterium  
 134 OTU\_371:k:Bacteria,p:Firmicutes,c:Clostridia,o:Lachnospirales,f:Lachnospiraceae,g:uncultured  
 135 OTU\_3461:k:Bacteria,p:Firmicutes,c:Clostridia,o:Oscillospirales,f:Oscillospiraceae,g:uncultured  
 136 OTU\_343:k:Bacteria,p:Deferribacterota,c:Deferribacteres,o:Deferribacterales,f:Deferribacteraceae,g:Mucispirillum  
 137 OTU\_3964:k:Bacteria,p:Actinobacteriota,c:Actinobacteria,o:Micrococcales,f:Micrococcaceae,g:Neomicrococcus,s:Micrococcus lylae  
 138 OTU\_1644:k:Bacteria,p:Firmicutes,c:Clostridia,o:Lachnospirales,f:Lachnospiraceae  
 139 OTU\_87:k:Bacteria,p:Proteobacteria,c:Alphaproteobacteria,o:Paracaedibacterales,f:Paracaedibacteraceae,g:uncultured,s:uncultured  
 140 OTU\_53:k:Bacteria,p:Firmicutes,c:Clostridia,o:Lachnospirales,f:Lachnospiraceae,g:Dorea  
 141 OTU\_113:k:Bacteria,p:Firmicutes,c:Clostridia,o:Lachnospirales,f:Lachnospiraceae,g:Frisingicoccus,s:Frisingicoccus caecimuris  
 142 OTU\_453:k:Bacteria,p:Proteobacteria,c:Alphaproteobacteria,o:Rhodobacterales,f:Rhodobacteraceae,g:Paracoccus  
 143 OTU\_194:k:Bacteria,p:Actinobacteriota,c:Coriobacteriia,o:Coriobacteriales,f:Atopobiaceae,g:Libanicoccus,s:uncultured bacterium  
 144 OTU\_390:k:Bacteria,p:Bacteroidota,c:Bacteroidia,o:Bacteroidales,f:Muribaculaceae  
 145 OTU\_137:k:Bacteria,p:Proteobacteria,c:Gammaproteobacteria,o:Pasteurellales,f:Pasteurellaceae,g:Actinobacillus,s:Actinobacillus porcitosillarum  
 146 OTU\_613:k:Bacteria,p:Actinobacteriota,c:Actinobacteria,o:Bifidobacteriales,f:Bifidobacteriaceae,g:Bifidobacterium,s:Bifidobacterium bifidum  
 147 OTU\_57:k:Bacteria,p:Bacteroidota,c:Bacteroidia,o:Bacteroidales,f:Bacteroidaceae,g:Bacteroides,s:uncultured bacterium  
 148 OTU\_202:k:Bacteria,p:Firmicutes,c:Clostridia,o:Oscillospirales,f:Oscillospiraceae,g:uncultured  
 149 OTU\_261:k:Bacteria,p:Bacteroidota,c:Bacteroidia,o:Bacteroidales,f:Bacteroidaceae,g:Bacteroides  
 150 OTU\_642:k:Bacteria,p:Firmicutes,c:Clostridia,o:Lachnospirales,f:Lachnospiraceae,g:Blautia,s:uncultured  
 151 OTU\_2551:k:Bacteria,p:Firmicutes  
 152 OTU\_122:k:Bacteria,p:Firmicutes,c:Clostridia,o:Oscillospirales,f:Butyricicoccaceae,g:Butyricicoccus  
 153 OTU\_808:k:Bacteria,p:Firmicutes,c:Clostridia,o:Lachnospirales,f:Lachnospiraceae,g:Lachnoclostridium,s:Uncultured bacterium  
 154 OTU\_482:k:Bacteria,p:Proteobacteria,c:Alphaproteobacteria,o:Rhizobiales,f:Rhizobiaceae,g:Allorhizobium-Neorhizobium-Pararhizobium Rhizobium  
 155 OTU\_400:k:Bacteria,p:Bacteroidota,c:Bacteroidia,o:Bacteroidales,f:Muribaculaceae  
 156 OTU\_74:k:Bacteria,p:Firmicutes,c:Clostridia,o:Peptostreptococcales-Tissierellales,f:Peptostreptococcaceae,g:Peptoclostridium,s:Peptacetobacter hiranonis  
 157 OTU\_1147:k:Bacteria,p:Firmicutes,c:Clostridia,o:Oscillospirales,f:[Eubacterium]\_coprostanoligenes-group  
 158 OTU\_279:k:Bacteria,p:Firmicutes,c:Clostridia,o:Peptostreptococcales-Tissierellales,f:Anaerovoracaceae,g:[Eubacterium]-nodatum group  
 159 OTU\_208:k:Bacteria,p:Firmicutes,c:Clostridia,o:Oscillospirales,f:Ruminococcaceae,g:Fournierella  
 160 OTU\_107:k:Bacteria,p:Firmicutes,c:Clostridia,o:Lachnospirales,f:Lachnospiraceae,g:Blautia,s:uncultured\_bacterium

161 OTU\_263:k:Bacteria,p:Bacteroidota,c:Bacteroidia,o:Bacteroidales,f:Muribaculaceae  
 162 OTU\_156:k:Bacteria,p:Actinobacteriota,c:Coriobacteriia,o:Coriobacteriales,f:Coriobacteriaceae,g:Collinsella,s:Collinsella intestinalis  
 163 OTU\_668:k:Bacteria,p:Desulfobacterota,c:Desulfovibrionia,o:Desulfovibrionales,f:Desulfovibrionaceae,g:Desulfovibrio,s:Uncultured  
 164 OTU\_765:k:Bacteria,p:Actinobacteriota,c:Coriobacteriia,o:Coriobacteriales,f:Atopobiaceae,g:Olsenella  
 165 OTU\_4315:k:Bacteria,p:Firmicutes,c:Bacilli,o:Lactobacillales,f:Lactobacillaceae,g:Lactobacillus,s:Uncultured bacterium  
 166 OTU\_3197:k:Bacteria,p:Firmicutes,c:Bacilli,o:Lactobacillales,f:Lactobacillaceae,g:Lactobacillus,s:Uncultured bacterium  
 167 OTU\_70:k:Bacteria,p:Bacteroidota,c:Bacteroidia,o:Bacteroidales,f:Prevotellaceae,g:Prevotellaceae NK3B31 group,s:uncultured  
 168 OTU\_4237:k:Bacteria,p:Firmicutes,c:Bacilli,o:Lactobacillales,f:Lactobacillaceae,g:Lactobacillus,s:uncultured  
 169 OTU\_118:k:Bacteria,p:Firmicutes,c:Clostridia,o:Lachnospirales,f:Lachnospiraceae,g:Fusicatenibacter  
 170 OTU\_569:k:Bacteria,p:Bacteroidota,c:Bacteroidia,o:Bacteroidales,f:Bacteroidaceae,g:Bacteroides  
 171 OTU\_440:k:Bacteria,p:Firmicutes,c:Clostridia,o:Lachnospirales,f:Lachnospiraceae,g:Tyzzerella  
 172 OTU\_227:k:Bacteria,p:Firmicutes,c:Clostridia,o:Oscillospirales,f:Ruminococcaceae,g:Anaerotruncus  
 173 OTU\_84:k:Bacteria,p:Bacteroidota,c:Bacteroidia,o:Bacteroidales,f:Muribaculaceae  
 174 OTU\_280:k:Bacteria,p:Bacteroidota,c:Bacteroidia,o:Bacteroidales,f:Bacteroidaceae,g:Bacteroides  
 175 OTU\_758:k:Bacteria,p:Firmicutes,c:Clostridia,o:Oscillospirales,f:Ruminococcaceae,g:Paludicola,s:uncultured  
 176 OTU\_672:k:Bacteria,p:Firmicutes,c:Clostridia,o:Lachnospirales,f:Lachnospiraceae  
 177 OTU\_2598:k:Bacteria,p:Firmicutes,c:Bacilli,o:Lactobacillales,f:Lactobacillaceae,g:Lactobacillus,s:uncultured Clostridiales  
 178 OTU\_499:k:Bacteria,p:Bacteroidota,c:Bacteroidia,o:Bacteroidales,f:Muribaculaceae  
 179 OTU\_109:k:Bacteria,p:Firmicutes,c:Clostridia,o:Oscillospirales,f:Oscillospiraceae,g:UCG-005,s:uncultured bacterium  
 180 OTU\_159:k:Bacteria,p:Firmicutes,c:Negativicutes,o:Veillonellales-Selenomonadales,f:Selenomonadaceae,g:Megamonas  
 181 OTU\_321:k:Bacteria,p:Firmicutes,c:Clostridia,o:Lachnospirales,f:Lachnospiraceae,g:Lachnospira,s:uncultured organism  
 182 OTU\_589:k:Bacteria,p:Firmicutes,c:Bacilli,o:Erysipelotrichales,f:Erysipelotrichaceae,g:Allobaculum  
 183 OTU\_355:k:Bacteria,p:Firmicutes,c:Clostridia,o:Lachnospirales,f:Lachnospiraceae,g:Oribacterium,s:uncultured  
 184 OTU\_110:k:Bacteria,p:Firmicutes,c:Clostridia,o:Lachnospirales,f:Lachnospiraceae,g:Roseburia,s:uncultured  
 185 OTU\_4501:k:Bacteria,p:Firmicutes,c:Bacilli,o:Lactobacillales,f:Lactobacillaceae,g:Lactobacillus,s:Uncultured Lactobacillus  
 186 OTU\_448:k:Bacteria,p:Firmicutes,c:Bacilli,o:Erysipelotrichales,f:Erysipelotrichaceae,g:Faecalibaculum,s:uncultured  
 187 OTU\_312:k:Bacteria,p:Bacteroidota,c:Bacteroidia,o:Bacteroidales,f:Muribaculaceae  
 188 OTU\_2565:k:Bacteria,p:Firmicutes,c:Clostridia,o:Lachnospirales,f:Lachnospiraceae,g:[Ruminococcus]-torques group,s:uncultured  
 189 OTU\_3029:k:Bacteria  
 190 OTU\_419:k:Bacteria,p:Bacteroidota,c:Bacteroidia,o:Bacteroidales,f:Bacteroidaceae,g:Bacteroides  
 191 OTU\_766:k:Bacteria,p:Bacteroidota,c:Bacteroidia,o:Bacteroidales,f:Muribaculaceae

192 OTU\_82:k:Bacteria,p:Firmicutes,c:Clostridia,o:Peptostreptococcales-Tissierellales,f:Peptostreptococcaceae  
 193 OTU\_171:k:Bacteria,p:Firmicutes,c:Clostridia,o:Lachnospirales,f:Lachnospiraceae,g:Ruminococcus-torques group  
 194 OTU\_342:k:Bacteria,p:Firmicutes,c:Bacilli,o:Erysipelotrichales,f:Erysipelotrichaceae,g:Holdemanella,s:uncultured  
 195 OTU\_458:k:Bacteria,p:Bacteroidota,c:Bacteroidia,o:Bacteroidales,f:Marinifilaceae,g:Butyricimonas,s:Butyricimonas Marseille-P2440  
 196 OTU\_3781:k:Bacteria,p:Firmicutes,c:Bacilli  
 197 OTU\_166:k:Bacteria,p:Firmicutes,c:Clostridia,o:Lachnospirales,f:Lachnospiraceae,g:uncultured,s:uncultured bacterium  
 198 OTU\_154:k:Bacteria,p:Bacteroidota,c:Bacteroidia,o:Bacteroidales,f:Rikenellaceae,g:Alistipes,s:uncultured bacterium  
 199 OTU\_737:k:Bacteria,p:Firmicutes,c:Clostridia,o:Oscillospirales,f:Oscillospiraceae,g:UCG-002,s:uncultured bacterium  
 200 OTU\_89:k:Bacteria,p:Firmicutes,c:Clostridia,o:Oscillospirales,f:Ruminococcaceae,g:Ruminococcus  
 201 OTU\_3816:k:Bacteria,p:Firmicutes,c:Clostridia,o:Lachnospirales,f:Lachnospiraceae  
 202 OTU\_169:k:Bacteria,p:Firmicutes,c:Clostridia,o:Oscillospirales,f:Ruminococcaceae,g:Negativibacillus  
 203 OTU\_19:k:Bacteria,p:Firmicutes,c:Bacilli,o:Mycoplasmatales,f:Mycoplasmataceae,g:Mycoplasma,s:Metamycoplasma sualvi  
 204 OTU\_49:k:Bacteria,p:Firmicutes,c:Bacilli,o:Lactobacillales,f:Leuconostocaceae,g:Weissella,s:Weissella hellenica  
 205 OTU\_281:k:Bacteria,p:Firmicutes,c:Bacilli,o:Erysipelotrichales,f:Erysipelatoclostridiaceae,g:Catenibacterium,s:uncultured bacterium  
 206 OTU\_181:k:Bacteria,p:Firmicutes,c:Bacilli,o:Lactobacillales,f:Carnobacteriaceae,g:Trichococcus  
 207 OTU\_347:k:Bacteria,p:Actinobacteriota,c:Coriobacteriia,o:Coriobacteriales,f:Atopobiaceae,g:Olsenella  
 208 OTU\_344:k:Bacteria,p:Bacteroidota,c:Bacteroidia,o:Bacteroidales,f:Muribaculaceae  
 209 OTU\_607:k:Bacteria,p:Bacteroidota,c:Bacteroidia,o:Bacteroidales,f:Tannerellaceae,g:Parabacteroides  
 210 OTU\_2876:k:Bacteria,p:Firmicutes,c:Clostridia,o:Clostridiales,f:Clostridiaceae,g:Clostridium sensu stricto-1,s:Clostridium paraputrificum  
 211 OTU\_11:k:Bacteria,p:Proteobacteria,c:Gammaproteobacteria,o:Burkholderiales,f:Burkholderiaceae,g:Ralstonia,s:Ralstonia insidiosa  
 212 OTU\_643:k:Bacteria,p:Firmicutes,c:Bacilli,o:Bacillales,f:Bacillaceae,g:Bacillus,s:Bacillus licheniformis  
 213 OTU\_3241:k:Bacteria,p:Firmicutes,c:Bacilli,o:Lactobacillales,f:Lactobacillaceae,g:Lactobacillus,s:Uncultured bacterium  
 214 OTU\_553:k:Bacteria,p:Proteobacteria,c:Alphaproteobacteria,o:Rhizobiales,f:Rhizobiaceae,g:Mesorhizobium  
 215 OTU\_414:k:Bacteria,p:Firmicutes,c:Negativicutes,o:Veillonellales-Selenomonadales,f:Veillonellaceae,g:Dialister,s:uncultured bacterium  
 216 OTU\_2970:k:Bacteria,p:Actinobacteriota,c:Coriobacteriia,o:Coriobacteriales,f:Coriobacteriaceae,g:Collinsella,s:uncultured  
 217 OTU\_101:k:Bacteria,p:Firmicutes,c:Clostridia,o:Oscillospirales,f:[Eubacterium]-coprostanoligenes group  
 218 OTU\_2822:k:Bacteria,p:Firmicutes,c:Clostridia,o:Lachnospirales,f:Lachnospiraceae  
 219 OTU\_447:k:Bacteria,p:Firmicutes,c:Bacilli,o:Erysipelotrichales,f:Erysipelotrichaceae,g:Dubosiella,s:Dubosiella newyorkensis  
 220 OTU\_147:k:Bacteria,p:Firmicutes,c:Bacilli,o:Lactobacillales,f:Streptococcaceae,g:Streptococcus,s:Streptococcus caballi  
 221 OTU\_161:k:Bacteria,p:Bacteroidota,c:Bacteroidia,o:Bacteroidales,f:Porphyromonadaceae,g:Porphyromonas,s:uncultured  
 222 OTU\_1965:k:Bacteria,p:Firmicutes,c:Clostridia,o:Oscillospirales,f:[Eubacterium]-coprostanoligenes group

223 OTU\_120:k:Bacteria,p:Firmicutes,c:Clostridia,o:Lachnospirales,f:Lachnospiraceae,g:Sellimonas,s:uncultured bacterium  
 224 OTU\_348:k:Bacteria,p:Firmicutes,c:Bacilli,o:Erysipelotrichales,f:Erysipelatoclostridiaceae,g:Erysipelatoclostridium,s:Thomasclostridium ramosa  
 225 OTU\_273:k:Bacteria,p:Bacteroidota,c:Bacteroidia,o:Bacteroidales,f:Prevotellaceae,g:Prevotellaceae UCG-001,s:uncultured  
 226 OTU\_4398:k:Bacteria,p:Firmicutes,c:Clostridia,o:Peptostreptococcales-Tissierellales,f:Peptostreptococcaceae,g:Intestinibacter,s:Clostridiaceae-DJF-VP56  
 227 OTU\_62:k:Bacteria,p:Firmicutes,c:Bacilli,o:Staphylococcales,f:Staphylococcaceae,g:Staphylococcus,s:Staphylococcus equorum  
 228 OTU\_3005:k:Bacteria,p:Firmicutes,c:Clostridia,o:Lachnospirales,f:Lachnospiraceae  
 229 OTU\_27:k:Bacteria,p:Spirochaetota,c:Spirochaetia,o:Spirochaetales,f:Spirochaetaceae,g:Treponema,s:uncultured bacterium  
 230 OTU\_269:k:Bacteria,p:Actinobacteriota,c:Coriobacteriia,o:Coriobacteriales,f:Eggerthellaceae,g:Senegalimassilia,s:Uncultured  
 231 OTU\_1269:k:Bacteria,p:Firmicutes,c:Clostridia,o:Oscillospirales,f:Ruminococcaceae,g:uncultured,s:uncultured bacterium  
 232 OTU\_148:k:Bacteria,p:Actinobacteriota,c:Actinobacteria,o:Micrococcales,f:Micrococcaceae,g:Rothia,s:Uncultured  
 233 OTU\_299:k:Bacteria,p:Firmicutes,c:Clostridia,o:Lachnospirales,f:Lachnospiraceae,g:Epulopiscium  
 234 OTU\_205:k:Bacteria,p:Firmicutes,c:Clostridia,o:Lachnospirales,f:Lachnospiraceae,g:Dorea  
 235 OTU\_433:k:Bacteria,p:Firmicutes,c:Clostridia,o:Oscillospirales,f:Butyricicoccaceae,g:Butyricicoccus,s:uncultured bacterium  
 236 OTU\_357:k:Bacteria,p:Firmicutes,c:Clostridia,o:Oscillospirales,f:Oscillospiraceae,g:Oscillospira,s:uncultured bacterium  
 237 OTU\_800:k:Bacteria,p:Firmicutes,c:Clostridia,o:Peptostreptococcales-Tissierellales,f:Anaerovoracaceae,g:Family-XIII-AD3011  
 238 OTU\_173:k:Bacteria,p:Bacteroidota,c:Bacteroidia,o:Bacteroidales,f:Rikenellaceae,g:Alistipes,s:uncultured Bacteroidales  
 239 OTU\_1783:k:Bacteria,p:Bacteroidota,c:Bacteroidia,o:Bacteroidales,f:Bacteroidaceae,g:Bacteroides  
 240 OTU\_235:k:Bacteria,p:Bacteroidota,c:Bacteroidia,o:Bacteroidales,f:Tannerellaceae,g:Parabacteroides,s:Parabacteroides sp.  
 241 OTU\_298:k:Bacteria,p:Firmicutes,c:Clostridia,o:Oscillospirales,f:Oscillospiraceae,g:NK4A214 group,s:uncultured  
 242 OTU\_117:k:Bacteria,p:Bacteroidota,c:Bacteroidia,o:Bacteroidales,f:Prevotellaceae,g:Alloprevotella,s:uncultured  
 243 OTU\_823:k:Bacteria,p:Firmicutes,c:Clostridia,o:Lachnospirales,f:Lachnospiraceae  
 244 OTU\_473:k:Bacteria,p:Firmicutes,c:Clostridia,o:Oscillospirales,f:Oscillospiraceae,g:UCG-005  
 245 OTU\_549:k:Bacteria,p:Bacteroidota,c:Bacteroidia,o:Bacteroidales,f:Muribaculaceae  
 246 OTU\_183:k:Bacteria,p:Actinobacteriota,c:Actinobacteria,o:Micrococcales,f:Dermacoccaceae,g:Dermacoccus  
 247 OTU\_1175:k:Bacteria,p:Firmicutes,c:Clostridia,o:Oscillospirales,f:Oscillospiraceae,g:UCG-005,s:uncultured bacterium  
 248 OTU\_3984:k:Bacteria,p:Firmicutes,c:Bacilli,o:Lactobacillales,f:Lactobacillaceae,g:Lactobacillus,s:Uncultured bacterium  
 249 OTU\_322:k:Bacteria,p:Firmicutes,c:Clostridia,o:Lachnospirales,f:Lachnospiraceae,g:Anaerostipes  
 250 OTU\_38:k:Bacteria,p:Proteobacteria,c:Gammaproteobacteria,o:Pseudomonadales,f:Pseudomonadaceae,g:Pseudomonas,s:Pseudomonas putida  
 251 OTU\_304:k:Bacteria,p:Firmicutes,c:Bacilli,o:Erysipelotrichales,f:Erysipelotrichaceae,g:Solobacterium,s:uncultured  
 252 OTU\_3486:k:Bacteria,p:Firmicutes,c:Clostridia,o:Lachnospirales,f:Lachnospiraceae,g:Blautia,s:uncultured  
 253 OTU\_2511:k:Bacteria,p:Actinobacteriota,c:Actinobacteria,o:Corynebacteriales,f:Nocardiaceae,g:Gordonia,s:Gordonia malaquae

254 OTU\_3970:k:Bacteria  
 255 OTU\_1354:k:Bacteria,p:Firmicutes,c:Bacilli  
 256 OTU\_520:k:Bacteria,p:Firmicutes,c:Clostridia,o:Peptostreptococcales-Tissierellales,f:Peptostreptococcaceae,g:Terrisporobacter,s:Terrisporobacter muris  
 257 OTU\_287:k:Bacteria,p:Actinobacteriota,c:Actinobacteria,o:Corynebacteriales,f:Corynebacteriaceae,g:Corynebacterium,s:Uncultured  
 258 OTU\_915:k:Bacteria,p:Firmicutes,c:Clostridia,o:Eubacteriales,f:Eubacteriaceae,g:Eubacterium,s:Eubacterium limosum  
 259 OTU\_325:k:Bacteria,p:Actinobacteriota,c:Coriobacteriia,o:Coriobacteriales,f:Eggerthellaceae  
 260 OTU\_2355:k:Bacteria,p:Actinobacteriota,c:Actinobacteria,o:Corynebacteriales,f:Corynebacteriaceae,g:Corynebacterium,s:Uncultured  
 261 OTU\_59:k:Bacteria,p:Firmicutes,c:Bacilli,o:Bacillales,f:Planococcaceae,g:Kurthia,s:Kurthia populi  
 262 OTU\_255:k:Bacteria,p:Firmicutes,c:Clostridia,o:Monoglobales,f:Monoglobaceae,g:Monoglobus,s:uncultured  
 263 OTU\_358:k:Bacteria,p:Bacteroidota,c:Bacteroidia,o:Bacteroidales,f:Muribaculaceae  
 264 OTU\_177:k:Bacteria,p:Firmicutes,c:Clostridia,o:Oscillospirales,f:Oscillospiraceae,g:Oscillibacter,s:uncultured bacterium  
 265 OTU\_1078:k:Bacteria,p:Proteobacteria,c:Gammaproteobacteria,o:Burkholderiales,f:Rhodocyclaceae,g:Dechloromonas  
 266 OTU\_604:k:Bacteria,p:Firmicutes,c:Clostridia,o:Christensenellales,f:Christensenellaceae,g:Christensenellaceae R-7 group,s:uncultured  
 267 OTU\_718:k:Bacteria,p:Actinobacteriota,c:Actinobacteria,o:Corynebacteriales,f:Dietziaceae,g:Dietzia,s:Dietzia timorensis  
 268 OTU\_238:k:Bacteria,p:Firmicutes,c:Bacilli,o:Staphylococcales,f:Staphylococcaceae,g:Jeotgalicoccus  
 269 OTU\_682:k:Bacteria,p:Firmicutes,c:Clostridia,o:Lachnospirales,f:Lachnospiraceae,g:[Eubacterium]-hallii group  
 270 OTU\_535:k:Bacteria,p:Bacteroidota,c:Bacteroidia,o:Bacteroidales,f:Muribaculaceae  
 271 OTU\_455:k:Bacteria,p:Bacteroidota,c:Bacteroidia,o:Bacteroidales,f:Muribaculaceae  
 272 OTU\_689:k:Bacteria,p:Bacteroidota,c:Bacteroidia,o:Bacteroidales,f:Tannerellaceae,g:Parabacteroides,s:uncultured bacterium  
 273 OTU\_612:k:Bacteria,p:Firmicutes,c:Clostridia,o:Peptostreptococcales-Tissierellales,f:Anaerovoracaceae,g:Mogibacterium,s:uncultured  
 274 OTU\_174:k:Bacteria,p:Firmicutes,c:Clostridia,o:Oscillospirales,f:Ruminococcaceae  
 275 OTU\_178:k:Bacteria,p:Firmicutes,c:Clostridia,o:Oscillospirales,f:Oscillospiraceae,g:Colidextribacter  
 276 OTU\_1929:k:Bacteria,p:Firmicutes,c:Clostridia,o:Peptococcales,f:Peptococcaceae,g:uncultured,s:uncultured bacterium  
 277 OTU\_742:k:Bacteria,p:Bacteroidota,c:Bacteroidia,o:Bacteroidales,f:Prevotellaceae  
 278 OTU\_594:k:Bacteria,p:Proteobacteria,c:Gammaproteobacteria,o:Pseudomonadales,f:Moraxellaceae  
 279 OTU\_1819:k:Bacteria,p:Firmicutes,c:Clostridia,o:Lachnospirales,f:Lachnospiraceae,g:GCA-900066575,s:uncultured bacterium  
 280 OTU\_1822:k:Bacteria,p:Firmicutes,c:Clostridia,o:Lachnospirales,f:Lachnospiraceae,g:Coprococcus,s:uncultured bacterium  
 281 OTU\_225:k:Bacteria,p:Bacteroidota,c:Bacteroidia,o:Bacteroidales,f:Bacteroidaceae,g:Bacteroides,s:uncultured bacterium  
 282 OTU\_424:k:Bacteria,p:Firmicutes,c:Clostridia,o:Oscillospirales,f:Ruminococcaceae,g:uncultured,s:uncultured bacterium  
 283 OTU\_158:k:Bacteria,p:Bacteroidota,c:Bacteroidia,o:Bacteroidales,f:Prevotellaceae,g:Alloprevotella,s:uncultured bacterium  
 284 OTU\_501:k:Bacteria,p:Firmicutes,c:Clostridia,o:Oscillospirales,f:[Eubacterium]\_coprostanoligenes group

285 OTU\_285:k:Bacteria,p:Bacteroidota,c:Bacteroidia,o:Bacteroidales,f:Rikenellaceae,g:Rikenellaceae RC9 gut group,s:uncultured  
 286 OTU\_1892:k:Bacteria,p:Firmicutes,c:Clostridia,o:Lachnospirales,f:Lachnospiraceae,g:Coproccoccus  
 287 OTU\_93:k:Bacteria,p:Firmicutes,c:Clostridia,o:Clostridia\_UCG-014  
 288 OTU\_2542:k:Bacteria,p:Firmicutes,c:Clostridia,o:Lachnospirales,f:Lachnospiraceae,g:Oribacterium,s:uncultured bacterium  
 289 OTU\_231:k:Bacteria,p:Patiscibacteria,c:Saccharimonadia,o:Saccharimonadales,f:Saccharimonadaceae,g:Candidatus Saccharimonas,s:uncultured  
 290 OTU\_423:k:Bacteria,p:Bacteroidota,c:Bacteroidia,o:Bacteroidales,f:Muribaculaceae  
 291 OTU\_1447:k:Bacteria,p:Firmicutes,c:Clostridia,o:Lachnospirales,f:Lachnospiraceae,g:uncultured  
 292 OTU\_3745:k:Bacteria,p:Firmicutes,c:Clostridia,o:Lachnospirales,f:Lachnospiraceae,g:Lachnospiraceae FCS020 group,s:uncultured  
 293 OTU\_204:k:Bacteria,p:Bacteroidota,c:Bacteroidia,o:Bacteroidales,f:Muribaculaceae  
 294 OTU\_878:k:Bacteria,p:Fusobacteriota,c:Fusobacteriia,o:Fusobacteriales,f:Leptotrichiaceae,g:Leptotrichia,s:Leptotrichia PG10  
 295 OTU\_387:k:Bacteria,p:Bacteroidota,c:Bacteroidia,o:Bacteroidales,f:Prevotellaceae,g:Prevotellaceae UCG-003  
 296 OTU\_284:k:Bacteria,p:Firmicutes,c:Clostridia,o:Oscillospirales,f:Ruminococcaceae,g:uncultured,s:uncultured bacterium  
 297 OTU\_826:k:Bacteria,p:Firmicutes,c:Clostridia,o:Oscillospirales,f:[Eubacterium]\_coprostanoligenes group  
 298 OTU\_125:k:Bacteria,p:Firmicutes,c:Bacilli,o:Staphylococcales,f:Staphylococcaceae,g:Jeotgalicoccus,s:Jeotgalicoccus pinnipedialis  
 299 OTU\_3646:k:Bacteria,p:Firmicutes,c:Bacilli,o:RF39  
 300 OTU\_1823:k:Bacteria,p:Proteobacteria,c:Alphaproteobacteria,o:Rhizobiales,f:Rhizobiaceae  
 301 OTU\_1411:k:Bacteria,p:Actinobacteriota,c:Coriobacteriia,o:Coriobacteriales,f:Eggerthellaceae,g:uncultured,s:uncultured bacterium  
 302 OTU\_1018:k:Bacteria,p:Firmicutes,c:Negativicutes,o:Veillonellales-Selenomonadales,f:Veillonellaceae,g:Allisonella,s:Allisonella histaminiformans  
 303 OTU\_744:k:Bacteria,p:Bacteroidota,c:Bacteroidia,o:Bacteroidales,f:Muribaculaceae  
 304 OTU\_1082:k:Bacteria,p:Actinobacteriota,c:Coriobacteriia,o:Coriobacteriales  
 305 OTU\_3059:k:Bacteria,p:Firmicutes,c:Clostridia,o:Lachnospirales,f:Lachnospiraceae  
 306 OTU\_937:k:Bacteria,p:Firmicutes,c:Bacilli,o:Lactobacillales,f:Streptococcaceae,g:Streptococcus,s:Strep  
 307 Ocococcus ferus  
 308 OTU\_1439:k:Bacteria,p:Actinobacteriota,c:Actinobacteria,o:Micrococcales,f:Microbacteriaceae,g:Leucobacter,s:Leucobacter sp.  
 309 OTU\_908:k:Bacteria,p:Firmicutes,c:Clostridia,o:Oscillospirales,f:Oscillospiraceae,g:uncultured  
 310 OTU\_309:k:Bacteria,p:Firmicutes,c:Clostridia,o:Oscillospirales,f:Ruminococcaceae,g:uncultured,s:uncultured bacterium  
 311 OTU\_2544:k:Bacteria,p:Firmicutes,c:Clostridia,o:Oscillospirales,f:Oscillospiraceae,g:uncultured,s:uncultured bacterium  
 312 OTU\_2833:k:Bacteria,p:Desulfobacterota,c:Desulfovibrionia,o:Desulfovibrionales,f:Desulfovibrionaceae,g:uncultured,s:uncultured  
 313 OTU\_904:k:Bacteria,p:Firmicutes,c:Bacilli,o:RF39  
 314 OTU\_1875:k:Bacteria,p:Firmicutes,c:Clostridia,o:Clostridiales,f:Clostridiaceae,g:Clostridium sensu stricto 13,s:Clostridium subterminale  
 315 OTU\_401:k:Bacteria,p:Proteobacteria,c:Alphaproteobacteria,o:Caulobacteriales,f:Caulobacteraceae,g:Brevundimonas

316 OTU\_4253:k:Bacteria,p:Firmicutes,c:Clostridia,o:Lachnospirales,f:Lachnospiraceae  
 317 OTU\_898:k:Bacteria,p:Firmicutes,c:Clostridia,o:Christensenellales,f:Christensenellaceae,g:Christensenellaceae R-7 group,s:uncultured  
 318 OTU\_274:k:Bacteria,p:Firmicutes,c:Clostridia,o:Oscillospirales,f:Ruminococcaceae,g:Ruminococcus,s:uncultured  
 319 OTU\_1213:k:Bacteria,p:Firmicutes,c:Clostridia,o:Oscillospirales,f:Ruminococcaceae,g:uncultured  
 320 OTU\_1552:k:Bacteria,p:Firmicutes,c:Clostridia,o:Oscillospirales,f:Oscillospiraceae,g:Colidextribacter,s:Uncultured bacterium  
 321 OTU\_393:k:Bacteria,p:Actinobacteriota,c:Coriobacteriia,o:Coriobacteriales,f:Eggerthellaceae,g:uncultured,s:uncultured  
 322 OTU\_615:k:Bacteria,p:Firmicutes,c:Clostridia,o:Monoglobales,f:Monoglobaceae,g:Monoglobus,s:uncultured bacterium  
 323 OTU\_1407:k:Bacteria,p:Firmicutes,c:Bacilli,o:Erysipelotrichales,f:Erysipelatoclostridiaceae,g:Erysipelatoclostridium,s:Uncultured bacterium  
 324 OTU\_517:k:Bacteria,p:Firmicutes,c:Clostridia,o:Lachnospirales,f:Lachnospiraceae  
 325 OTU\_2626:k:Bacteria,p:Firmicutes,c:Negativicutes,o:Veillonellales-Selenomonadales,f:Selenomonadaceae,g:Megamonas,s:Megamonas funiformis  
 326 OTU\_1003:k:Bacteria,p:Firmicutes,c:Clostridia,o:Oscillospirales,f:Oscillospiraceae,g:UCG-005,s:uncultured bacterium  
 327 OTU\_2976:k:Bacteria,p:Firmicutes,c:Bacilli,o:Lactobacillales,f:Streptococcaceae,g:Streptococcus,s:Streptococcus anginosus  
 328 OTU\_331:k:Bacteria,p:Bacteroidota,c:Bacteroidia,o:Bacteroidales,f:Rikenellaceae,g:dgA-11 gut group,s:uncultured bacterium  
 329 OTU\_786:k:Bacteria,p:Firmicutes,c:Clostridia,o:Peptostreptococcales-Tissierellales,f:Anaerovoracaceae,g:[Eubacterium]-brachy group,s:uncultured  
 330 OTU\_3909:k:Bacteria,p:Firmicutes,c:Clostridia,o:Lachnospirales,f:Lachnospiraceae  
 331 OTU\_688:k:Bacteria,p:Firmicutes,c:Bacilli,o:Erysipelotrichales,f:Erysipelotrichaceae,g:uncultured,s:uncultured bacterium  
 332 OTU\_631:k:Bacteria,p:Firmicutes,c:Clostridia,o:Oscillospirales,f:Oscillospiraceae  
 333 OTU\_481:k:Bacteria,p:Firmicutes,c:Clostridia,o:Lachnospirales,f:Lachnospiraceae,g:uncultured,s:uncultured bacterium  
 334 OTU\_249:k:Bacteria,p:Firmicutes,c:Bacilli,o:Lactobacillales,f:Aerococcaceae,g:Aerococcus,s:Aerococcus viridans  
 335 OTU\_1137:k:Bacteria,p:Firmicutes,c:Clostridia,o:uncultured  
 336 OTU\_1833:k:Bacteria,p:Firmicutes,c:Clostridia,o:Oscillospirales,f:Oscillospiraceae,g:uncultured  
 337 OTU\_630:k:Bacteria,p:Firmicutes,c:Clostridia,o:Oscillospirales,f:Ruminococcaceae,g:Incetae Sedis,s:Uncultured bacterium  
 338 OTU\_1104:k:Bacteria,p:Firmicutes,c:Bacilli,o:Bacillales,f:Planococcaceae  
 339 OTU\_3986:k:Bacteria,p:Firmicutes,c:Clostridia,o:Oscillospirales,f:[Eubacterium]-coprostanoligenes group  
 340 OTU\_2968:k:Bacteria,p:Firmicutes,c:Clostridia,o:Lachnospirales,f:Lachnospiraceae  
 341 OTU\_368:k:Bacteria,p:Firmicutes,c:Bacilli,o:Lactobacillales,f:Aerococcaceae  
 342 OTU\_3830:k:Bacteria,p:Firmicutes,c:Clostridia,o:Lachnospirales,f:Lachnospiraceae  
 343 OTU\_449:k:Bacteria,p:Firmicutes,c:Clostridia,o:Lachnospirales,f:Lachnospiraceae  
 344 OTU\_509:k:Bacteria,p:Firmicutes,c:Clostridia,o:Christensenellales,f:Christensenellaceae,g:Christensenellaceae R-7 group  
 345 OTU\_2606:k:Bacteria,p:Actinobacteriota,c:Actinobacteria,o:Corynebacteriales,f:Corynebacteriaceae,g:Corynebacterium,s:Corynebacterium casei  
 346 OTU\_746:k:Bacteria,p:Firmicutes,c:Negativicutes,o:Veillonellales-Selenomonadales,f:Veillonellaceae,g:Veillonella,s:Veillonella sp



347 OTU\_418:k:Bacteria,p:Firmicutes,c:Bacilli,o:Erysipelotrichales,f:Erysipelatoclostridiaceae,g:Erysipelatoclostridium,s:uncultured  
 348 OTU\_426:k:Bacteria,p:Bacteroidota,c:Bacteroidia,o:Bacteroidales,f:Rikenellaceae,g:Rikenellaceae RC9 gut group,s:uncultured  
 349 OTU\_500:k:Bacteria,p:Bacteroidota,c:Bacteroidia,o:Bacteroidales,f:Muribaculaceae  
 350 OTU\_483:k:Bacteria,p:Proteobacteria,c:Gammaproteobacteria,o:Burkholderiales,f:Comamonadaceae,g:Delftia,s:Delftia acidovorans  
 351 OTU\_384:k:Bacteria,p:Firmicutes,c:Clostridia,o:Oscillospirales  
 352 OTU\_3775:k:Bacteria,p:Firmicutes,c:Bacilli,o:Lactobacillales,f:Lactobacillaceae,g:Lactobacillus,s:Lactobacillus reuteri  
 353 OTU\_534:k:Bacteria,p:Firmicutes,c:Bacilli,o:Lactobacillales,f:Aerococcaceae,g:Aerosphaera,s:Fundicoccus ignavus  
 354 OTU\_1028:k:Bacteria,p:Firmicutes,c:Clostridia,o:Peptococcales,f:Peptococcaceae,g:uncultured,s:uncultured bacterium  
 355 OTU\_391:k:Bacteria,p:Firmicutes,c:Clostridia,o:Oscillospirales,f:Oscillospiraceae,g:Flavonifractor,s:Flavonifractor plautii  
 356 OTU\_565:k:Bacteria,p:Firmicutes,c:Clostridia,o:Oscillospirales,f:Ruminococcaceae,g:UBA1819,s:Ruthenibacterium lactatiformans  
 357 OTU\_385:k:Bacteria,p:Firmicutes,c:Clostridia,o:Peptostreptococcales-Tissierellales  
 358 OTU\_649:k:Bacteria,p:Firmicutes,c:Clostridia,o:Christensenellales,f:Christensenellaceae,g:Christensenellaceae R-7 group,s:uncultured  
 359 OTU\_3395:k:Bacteria,p:Firmicutes,c:Clostridia,o:Lachnospirales,f:Lachnospiraceae  
 360 OTU\_1768:k:Bacteria,p:Actinobacteriota,c:Coriobacteriia,o:Coriobacteriales,f:Atopobiaceae  
 361 OTU\_1123:k:Bacteria,p:Firmicutes,c:Bacilli,o:Erysipelotrichales,f:Erysipelotrichaceae,g:uncultured,s:uncultured bacterium  
 362 OTU\_1042:k:Bacteria,p:Firmicutes,c:Bacilli,o:Erysipelotrichales,f:Erysipelotrichaceae,g:Erysipelotrichaceae UCG-006,s:uncultured  
 363 OTU\_4419:k:Bacteria,p:Firmicutes,c:Bacilli,o:Lactobacillales,f:Lactobacillaceae,g:Lactobacillus,s:Uncultured bacterium  
 364 OTU\_314:k:Bacteria,p:Firmicutes,c:Clostridia,o:Lachnospirales,f:Lachnospiraceae  
 365 OTU\_882:k:Bacteria,p:Actinobacteriota,c:Coriobacteriia,o:Coriobacteriales,f:Eggerthellaceae,g:Enterorhabdus,s:uncultured  
 366 OTU\_705:k:Bacteria,p:Actinobacteriota,c:Coriobacteriia,o:Coriobacteriales,f:Coriobacteriaceae,g:Collinsella  
 367 OTU\_2147:k:Bacteria,p:Firmicutes,c:Clostridia,o:Oscillospirales,f:Ruminococcaceae,g:[Eubacterium]-siraeum group  
 368 OTU\_1203:k:Bacteria,p:Actinobacteriota,c:Coriobacteriia,o:Coriobacteriales,f:Eggerthellaceae  
 369 OTU\_640:k:Bacteria,p:Bacteroidota,c:Bacteroidia,o:Bacteroidales,f:Rikenellaceae,g:Alistipes,s:uncultured  
 370 OTU\_822:k:Bacteria,p:Bacteroidota,c:Bacteroidia,o:Bacteroidales,f:Muribaculaceae  
 371 OTU\_337:k:Bacteria,p:Firmicutes,c:Bacilli,o:Lactobacillales,f:Aerococcaceae,g:Facklamia,s:Uncultured  
 372 OTU\_3310:k:Bacteria,p:Actinobacteriota,c:Actinobacteria,o:Frankiales,f:Sporichthyaceae,g:hgcI clade,s:uncultured bacterium  
 373 OTU\_2237:k:Bacteria,p:Actinobacteriota,c:Coriobacteriia,o:Coriobacteriales,f:Eggerthellaceae  
 374 OTU\_1063:k:Bacteria,p:Firmicutes,c:Clostridia,o:Christensenellales,f:Christensenellaceae,g:Christensenellaceae R-7 group,s:uncultured  
 375 OTU\_537:k:Bacteria,p:Firmicutes,c:Bacilli,o:Lactobacillales,f:Carnobacteriaceae  
 376 OTU\_709:k:Bacteria,p:Proteobacteria,c:Gammaproteobacteria,o:Enterobacterales,f:Yersiniaceae,g:Serratia,s:Serratia proteamaculans  
 377 OTU\_3243:k:Bacteria,p:Firmicutes,c:Bacilli,o:Lactobacillales,f:Lactobacillaceae,g:Lactobacillus,s:uncultured bacterium

378 OTU\_1346:k:Bacteria,p:Actinobacteriota,c:Actinobacteria,o:Actinomycetales,f:Actinomycetaceae,g:Actinomyces  
 379 OTU\_4014:k:Bacteria,p:Proteobacteria,c:Alphaproteobacteria,o:Sphingomonadales,f:Sphingomonadaceae,g:Novosphingobium  
 380 OTU\_404:k:Bacteria,p:Firmicutes,c:Bacilli,o:Erysipelotrichales,f:Erysipelatoclostridiaceae,g:Candidatus Stoquefichus  
 381 OTU\_663:k:Bacteria,p:Firmicutes,c:Clostridia,o:Clostridia vadinBB60 group  
 382 OTU\_941:k:Bacteria,p:Firmicutes,c:Clostridia,o:Oscillospirales,f:Oscillospiraceae,g:Oscillibacter,s:uncultured bacterium  
 383 OTU\_563:k:Bacteria,p:Firmicutes,c:Clostridia,o:Lachnospirales,f:Lachnospiraceae,g:Lachnospiraceae NK4A136 group  
 384 OTU\_1827:k:Bacteria,p:Firmicutes,c:Clostridia,o:Peptostreptococcales-Tissierellales,g:Anaerococcus,s:Anaerococcus nagyae  
 385 OTU\_767:k:Bacteria,p:Proteobacteria,c:Alphaproteobacteria,o:Sphingomonadales,f:Sphingomonadaceae,g:Erythrobacter,s:Erythrobacter DHXJ15  
 386 OTU\_812:k:Bacteria,p:Firmicutes,c:Clostridia,o:Oscillospirales,f:Butyricicoccaceae,g:UCG-009,s:uncultured bacterium  
 387 OTU\_713:k:Bacteria,p:Firmicutes,c:Bacilli,o:RF39  
 388 OTU\_1333:k:Bacteria,p:Firmicutes,c:Clostridia,o:Oscillospirales,f:Ruminococcaceae,g:uncultured,s:uncultured bacterium  
 389 OTU\_3562:k:Bacteria,p:Patescibacteria,c:Saccharimonadia,o:Saccharimonadales  
 390 OTU\_944:k:Bacteria,p:Proteobacteria,c:Alphaproteobacteria,o:Rhizobiales,f:Hyphomicrobiaceae,g:Pedomicrobium,s:Uncultured  
 391 OTU\_1622:k:Bacteria,p:Patescibacteria,c:Saccharimonadia,o:Saccharimonadales  
 392 OTU\_1506:k:Bacteria,p:Patescibacteria,c:Saccharimonadia,o:Saccharimonadales  
 393 OTU\_874:k:Bacteria,p:Actinobacteriota,c:Actinobacteria,o:Actinomycetales,f:Actinomycetaceae,g:Actinomyces,s:Uncultured  
 394 OTU\_1316:k:Bacteria,p:Actinobacteriota,c:Coriobacteriia,o:Coriobacteriales,f:Eggerthellaceae,g:Slackia,s:Slackia piriformis  
 395 OTU\_4301:k:Bacteria,p:Firmicutes,c:Bacilli,o:Lactobacillales,f:Streptococcaceae  
 396 OTU\_1460:k:Bacteria,p:Actinobacteriota,c:Actinobacteria,o:Bifidobacteriales,f:Bifidobacteriaceae,g:Bifidobacterium,s:Bifidobacterium mongoliense

---
