# Supplementary material for: A Comparative Analysis of the Stomach, Gut, and Lung Microbiomes in Rattus norvegicus
Source: Microorganisms. 2023 Sep 21;11(9):2359. doi: 10.3390/microorganisms11092359 (PMC10534326; doi:10.3390/microorganisms11092359)
Supplement: Supplementary file 1 [file microorganisms-11-02359-s001.zip]

Archive with 6 entries (6 files):
- Suppl. Figure S1.jpg
- Suppl. Figure S2 20 OTUs.jpg
- Suppl. Figure S3. LDA.jpg
- Suppl. Figure S4. random forest analysis.jpg
- Suppl. Figures legends.pdf
- Suppl. Tables S1, S2, S3, S4.S5, S6, S7, S8, S9,S10.pdf
